# Supplementary material
Source: publisher site journal article supplement (https://www.degruyterbrill.com/publication/isbn/9783839450314/downloadAsset/9783839450314_Leseprobe.pdf)
Supplement: Supplementary file 1 [file 9783839450314_Leseprobe.pdf]



Sophie Lorenz

# »SCHWARZE SCHWESTER ANGELA«

—

## DIE DDR UND ANGELA DAVIS

Kalter Krieg, Rassismus und Black Power  
1965–1975

[transcript] Histoire

**Aus:**

*Sophie Lorenz*

**»Schwarze Schwester Angela« – Die DDR und Angela Davis  
Kalter Krieg, Rassismus und Black Power 1965-1975**

Juni 2020, 304 S., kart., 4 SW-Abb.

49,00 € (DE), 978-3-8376-5031-0

E-Book:

PDF: 48,99 € (DE), ISBN 978-3-8394-5031-4

Die afroamerikanische Bürgerrechtlerin Angela Davis erlangte in den 1960er Jahren Bekanntheit als Black Power-Ikone und galt als internationale Leitfigur der studentischen Protestbewegungen um 1968. Die Beziehungen zwischen Angela Davis und der DDR sowie die umfangreiche Solidaritätskampagne der DDR für Davis haben dabei jedoch bislang kaum Beachtung gefunden. Sophie Lorenz zeigt, welche Bedeutung Angela Davis in der DDR vor dem Hintergrund des Kalten Krieges zugeschrieben wurde. Sie beleuchtet damit nicht nur Davis' Rolle als Akteurin der Global Sixties neu, sondern erweitert die Historiografie zu Rassismus-Debatten in der BRD um eine ostdeutsche Perspektive.

**Sophie Lorenz**, geb. 1982, studierte Geschichte, Politikwissenschaft und Öffentliches Recht an der Universität Heidelberg. Sie war dort als wissenschaftliche Mitarbeiterin am Historischen Seminar tätig und schloss 2018 ihre Dissertation ab.

Weitere Informationen und Bestellung unter:  
[www.transcript-verlag.de/978-3-8376-5031-0](http://www.transcript-verlag.de/978-3-8376-5031-0)

# Inhalt

---

|                                                                                               |     |
|-----------------------------------------------------------------------------------------------|-----|
| <b>Danksagung</b> .....                                                                       | 7   |
| <b>Einleitung</b> .....                                                                       | 9   |
| <b>1 Internationale Solidaritätspolitik und sozialistischer Antirassismus in der DDR</b> .... | 37  |
| 1.1 Der ideologische Kampfbegriff Solidarität .....                                           | 37  |
| 1.2 Solidarität mit dem <i>anderen Amerika</i> .....                                          | 44  |
| 1.3 Rot-schwarze Verbundenheitsgefühle .....                                                  | 49  |
| <b>2 Die afroamerikanische Linke und ihre Verbindungen zum kommunistischen Ausland</b> .....  | 57  |
| 2.1 Frühe kommunistisch-afroamerikanische Begegnungen .....                                   | 57  |
| 2.1.1 Die ersten rot-schwarzen Kontakte .....                                                 | 60  |
| 2.1.2 US-amerikanischer Rassismus und der Fall der Scottsboro Boys .....                      | 67  |
| 2.1.3 Das sowjetische Ideal bekommt Risse .....                                               | 73  |
| 2.2 Afroamerikanische Verbundenheitsvorstellungen vor und nach 1945 .....                     | 76  |
| 2.2.1 Eine neue Radikalität: <i>Southern Negro Youth Congress</i> (SNYC) .....                | 77  |
| 2.2.2 Ein neuer Impuls: Internationale Verbundenheitsrhetorik .....                           | 83  |
| 2.3 Verbundenheitsvorstellungen in der DDR .....                                              | 87  |
| 2.3.1 Rot-schwarze Freundschaft: W.E.B. Du Bois und Paul Robeson .....                        | 90  |
| 2.3.2 Die DDR und <i>Black Power</i> .....                                                    | 97  |
| <b>3 Angela Davis' Identitätswurf und ihr Kampf für Freiheit und Gleichheit</b> .....         | 105 |
| 3.1 Kindheit und Jugend (1944-1961) .....                                                     | 106 |
| 3.2 Studium und Politisierung (1961-1967) .....                                               | 113 |
| 3.2.1 Internationale Begegnungen und das Paris der 1960er Jahre .....                         | 114 |
| 3.2.2 Herbert Marcuse und die Studentenproteste in Deutschland .....                          | 120 |
| 3.2.3 Rückkehr in die USA: Von der Theorie Marx' zur Praxis des <i>Black Power</i> .....      | 127 |
| 3.3 Radikalisierung und Verhaftung (1967-1970) .....                                          | 129 |
| 3.3.1 Männlicher Chauvinismus und der Austritt aus dem SNCC .....                             | 133 |
| 3.3.2 Mitgliedschaft in der CPUSA und der Kampf um akademische Freiheit .....                 | 136 |

|          |                                                                                       |     |
|----------|---------------------------------------------------------------------------------------|-----|
| 3.3.3    | Schwarz, links, revolutionär: Die Soledad Brothers und <i>Free Angela Davis</i> ..... | 146 |
| <b>4</b> | <b>Die DDR-Solidaritätskampagne für Angela Davis</b> .....                            | 169 |
| 4.1      | Erster Mobilisierungsschub (1970-1971).....                                           | 169 |
| 4.1.1    | Formierung der Kampagne .....                                                         | 169 |
| 4.1.2    | Inszenierung der rot-schwarzen Solidarität.....                                       | 187 |
| 4.1.3    | Greifbare Solidarität: Das <i>andere Amerika</i> zu Besuch .....                      | 202 |
| 4.2      | Ausweitung der Mobilisierung (1971-1972).....                                         | 212 |
| 4.2.1    | Ritualisierte Massenveranstaltungen.....                                              | 214 |
| 4.2.2    | USA-Sonderkorrespondent Steiniger.....                                                | 218 |
| 4.3      | Finaler Akt der Selbstinszenierung (1972-1975) .....                                  | 222 |
| 4.3.1    | Bilder gelebter Solidarität: Angela Davis besucht die DDR .....                       | 224 |
| 4.3.2    | Die Saat geht auf: Die DDR wird Teil der Weltgemeinschaft.....                        | 235 |
|          | <b>Abschlussbetrachtung</b> .....                                                     | 251 |
|          | <b>Abkürzungsverzeichnis</b> .....                                                    | 257 |
|          | <b>Quellen</b> .....                                                                  | 261 |
|          | Archivsammlungen Deutschland.....                                                     | 261 |
|          | Archivsammlungen USA .....                                                            | 262 |
|          | Digitale Archive und Datenbanken.....                                                 | 264 |
|          | Filme .....                                                                           | 265 |
|          | Zeitungen .....                                                                       | 265 |
|          | Publizierte Quellen.....                                                              | 267 |
|          | Sekundärliteratur .....                                                               | 274 |

## Danksagung

---

An erster Stelle möchte ich meinem Doktorvater Prof. Dr. Manfred Berg danken. Er hat mich und mein Promotionsvorhaben von Anfang an unterstützt und als Betreuer mit Rat und Tat begleitet. Gleichzeitig hat er als Vorgesetzter ein Arbeitsklima und wertvolle Freiräume geschaffen, in denen ich an meiner Dissertation arbeiten und sie weiterentwickeln konnte.

Außerdem gilt mein Dank Prof. Dr. Tanja Penter, die sich als Zweitgutachterin zur Verfügung stellte und deren Kolloquium mir eine neue und für diese Arbeit grundlegende Perspektive auf die Geschichte der Sowjetunion und Osteuropas eröffnete.

Zu Dank verpflichtet bin ich auch dem Deutschen Historischen Institut in Washington D.C. für dessen finanzielle Förderung und Unterstützung im Rahmen des *Doctoral Fellowship in the History of African Americans and Germans/Germany*. Dies ermöglichte mir die dieser Arbeit zugrundeliegende Archivforschung in unterschiedlichen US-amerikanischen Archiven. Durch zahlreiche Gespräche und unsere Zusammenarbeit im Rahmen seines Projektes *Civil Rights Struggle, African American GIs, and Germany (AACVR) – Digital Archive* hat Prof. Dr. Martin Klimke wesentlich zum Entstehen dieser Arbeit beigetragen.

Dem Heidelberg Center for American Studies unter der Führung von Prof. Dr. Detlef Junker und Dr. Wilfried Mausbach sowie seinen Mitarbeiterinnen und Mitarbeitern danke ich herzlich für die langjährige Unterstützung und Verbundenheit, die zeitlich weit über den Rahmen der Doktorarbeit hinausreicht. Die unzähligen Gespräche und Diskussionen habe ich fachlich und persönlich als große Bereicherung erlebt. Danken möchte ich auch meinen Kolleginnen und Kollegen am Historischen Seminar der Universität Heidelberg für die Unterstützung, die kollegiale Zusammenarbeit und die vielen anregenden Gespräche. Insbesondere gilt dies für Andreas Riffel, mit dem ich nicht nur freundschaftlich und kollegial Büro und Lehrstuhlverpflichtungen geteilt habe, sondern auch die Hoch- und Tiefphasen, die eine solche Arbeit begleiten.

Die Philosophische Fakultät der Universität Heidelberg förderte im Rahmen des heiDOCS-Programms die Drucklegung in vollem Umfang, wofür ich sehr dankbar bin. Ich danke auch Katrin Herbon, die mit hilfreichen Anmerkungen, großem

Einsatz und ebensolcher Sorgfalt dazu beigetragen hat, dass diese Arbeit publiziert werden konnte.

Besonders bedanken möchte ich mich bei Anne und Daniel. Sie haben diese Arbeit fachlich mit ihren Anregungen und Rückmeldungen sowie freundschaftlichen Ratschlägen über die gesamte Entwicklung vom Exposé über die Abgabe und Verteidigung bis zur Publikation begleitet.

Ich danke meinen Eltern, die an mich geglaubt haben und mich immer in meinem Weg unterstützt und bestärkt haben. Meine Familie hat von Heidelberg, Verdun und Leipzig aus mit inhaltlichem Feedback, vor allem aber auch mit Einsatz und Hilfsbereitschaft insbesondere in der letzten Phase die Fertigstellung der Arbeit ermöglicht. Jan danke ich für seine unermüdliche Unterstützung und unendliche Geduld – ohne ihn wäre diese Arbeit nicht möglich gewesen.

## Einleitung

---

Am 12. September 1972 lautete die Überschrift der Titelseite der Zeitung *Neues Deutschland*, dem Zentralorgan der Sozialistischen Einheitspartei Deutschlands (SED): »Ein Tag im Zeichen unserer internationalen Solidarität«<sup>1</sup>. Sie stand damit ganz im Zeichen des Internationalismus und war in der DDR nichts Ungewöhnliches, galt internationale Solidarität doch als eine »mächtige moralische Triebkraft der Sozialistischen Gesellschaft« im Kampf gegen den Kapitalismus. Dementsprechend wurde ihr von der Parteiführung große Bedeutung im Alltag der DDR beigemessen.<sup>2</sup> Von Alltäglichkeit konnte bei den dazugehörigen Presseaufnahmen jedoch nicht die Rede sein. Gleich zuoberst war auf der Titelseite ein Bild zu sehen, das Erich Honecker, Erster Sekretär des Zentralkomitees der SED, in händeschüttelnder Pose mit einer jungen schwarzen Frau zeigte. Beide lächelten sich freundlich an und schienen sichtlich erfreut über diese, wie es in der Bildunterschrift hieß, »herzliche Begegnung im Geiste des proletarischen Internationalismus und der Kampfsolidarität«.<sup>3</sup> Die Aufnahme zeugte von einer Diskrepanz, wie sie größer nicht hätte sein können. Dem zu diesem Zeitpunkt sechzigjährigen Honecker, »erster Repräsentant« der DDR und kommunistisch »konservativer Hardliner«<sup>4</sup>, wie immer eher unauffällig gekleidet, stand die achtundzwanzigjährige Afroamerikanerin Angela Davis gegenüber, die mit ihrer Afrofrisur und ihren großen Creolen im Ohr den revolutionären Glamour und die neue militante Radikalität der *Black Power*-Bewegung symbolisierte.<sup>5</sup> Dessen ungeachtet sollte der in dem Bild festgehaltene Empfang eine besondere Verbundenheit ausdrücken. So habe Honecker

---

1 »Ein Tag im Zeichen unserer internationalen Solidarität«, in: *Neues Deutschland* (12.09.1972), S. 1.

2 »Solidarität«, in: Dietz Verlag (Hg.), *Kleines Politisches Wörterbuch*, Berlin (Ost) 1967, S. 577-578, hier: S. 578.

3 »Erich Honecker empfing Genossin Angela Davis«, in: *Neues Deutschland* (12.09.1972).

4 Martin Sabrow, »Der führende Repräsentant. Erich Honecker in generationsbiographischer Perspektive«, in: *Zeithistorische Forschungen/Studies in Contemporary History*, Online-Ausgabe, 10 (2013), H. 1, URL: [www.zeithistorische-forschungen.de/1-2013/id=4665](http://www.zeithistorische-forschungen.de/1-2013/id=4665), (zuletzt abgerufen: 01.02.2020).

5 »Ein Tag im Zeichen unserer internationalen Solidarität«, in: *Neues Deutschland* (12.09.1972), S. 1.

die »mutige Haltung, Standhaftigkeit und Tapferkeit« der »Genossin Angela« gewürdigt und betont, die Bürger der DDR würden sich »stolz und glücklich« fühlen, die tapfere Kommunistin in »ihrer Mitte zu wissen.«<sup>6</sup> Tatsächlich stand der Empfang von Angela Davis in der DDR einem Staatsbesuch in keiner Weise nach. Vergewärtigt man sich allerdings Davis' politische Symbolik als Vertreterin<sup>7</sup> einer neuen linken, militanten Aktivistengeneration zu diesem Zeitpunkt, ist dieses offizielle Treffen keineswegs so selbstverständlich, wie es auf der Titelseite erscheinen mag.<sup>8</sup>

Im August 1970 war Angela Davis wegen ihrer angeblichen Mittäterschaft bei einer missglückten Geiselnahme in einem kalifornischen Gerichtsgebäude vom *Federal Bureau of Investigation* (FBI) auf die Liste der zehn meistgesuchten Verbrecherinnen der USA gesetzt worden. Ziel der Geiselnahme war die Befreiung dreier afroamerikanischer Gefängnisinsassen, den sogenannten Soledad Brothers, denen der Mord an einem Gefängniswärter vorgeworfen wurde. Davis hatte sich in einer Bürgerinitiative, die den Freispruch der drei Männer forderte, politisch engagiert. Weil die bei der Geiselnahme verwendeten Waffen auf ihren Namen registriert waren, wurde Davis der Mittäterschaft verdächtigt, obwohl sie sich nicht im Gerichtsgebäude befunden hatte. Nachdem sie zwei Monate untergetaucht war, wurde Davis schließlich am 13. Oktober 1970 vom FBI verhaftet.

Vor dem Hintergrund der sich zunehmend radikalisierenden neuen linken Protestbewegungen zählte das FBI Angela Davis zu den gefährlichsten Frauen Amerikas. Das Magazin *Newsweek* porträtierte Davis als »schwarze Revolutionärin«.<sup>9</sup> Diese Darstellung spiegelte die Angst vor der Gewalt und den Bomben eines politisch motivierten, linken Terrorismus von linksradikalen Gruppierungen wie dem *Weathermen Underground* wider, den man nun auch durch Angela Davis gestärkt sah.<sup>10</sup> Sowohl für die Nixon-Regierung als auch für viele andere US-Amerikaner –

6 »Erich Honecker empfing Genossin Angela Davis«, in: *Neues Deutschland* (12.11.1972).

7 Wenn möglich, wurden in diesem Buch im Sinne einer geschlechtergerechten Sprache geschlechtsneutrale Formulierungen verwendet oder, sofern dies aus geschichtswissenschaftlicher Perspektive eindeutig zutreffend ist, beide Geschlechter durch eine Beidnennung sichtbar gemacht.

8 Inwiefern dieses öffentliche Bild auch von Davis' symbolischer Selbstinszenierung beeinflusst wurde, wird im Folgenden genauer betrachtet.

9 »The FBI's Toughest Foe: »The Kids«, in: *Newsweek* (26.10.1970), S. 23.

10 Für diese politisch motivierte Form der Gewalt bürgerte sich sowohl in der Bundesrepublik als auch in den USA der Begriff des Terrorismus ein. Die hierzu entstandene historische Forschung übernahm den Begriff ebenfalls (vgl. Herfried Münkler, »Guerillakrieg und Terrorismus. Begriffliche Unklarheit mit politischen Folgen«, in: Wolfgang Kraushaar (Hg.), *Die RAF und der linke Terrorismus*, 2 Bde., Hamburg 2006, Bd. 1, S. 78-102). Zu den Weathermen siehe Jeremy Varon, *Bringing the War Home. The Weathermen Underground, the Red Army Faction, and Revolutionary Violence in the Sixties and Seventies*, Berkeley 2004. Zum staatlichen Umgang mit linker Gewalt siehe Gabriele Metzler, »Konfrontation und Kommunikation. Demokratischer

besonders die durch einen festen Glauben an das amerikanische Gesellschaftsmodell geprägte weiße Mittelschicht – war Davis zur Personifikation einer neuen Generation von »jungen, unabhängigen Revolutionären« geworden, die laut *Newsweek* eine »neue und besondere Herausforderung für die erprobten Methoden des FBI« darstellten.<sup>11</sup> *Newsweek* zeichnete damit ein Bedrohungsszenario, in dem Angela Davis als entschiedene Vertreterin einer neuen linken Radikalität zur ultimativen Gegenspielerin des Modells des *Liberalen Konsens* wurde.

Der Begriff *Liberaler Konsens* beschreibt die Übereinstimmung zwischen Vertretern unterschiedlicher Parteien zu Fragen der sozialen und politischen Ordnung, die vor allem in den zwei Jahrzehnten nach dem Zweiten Weltkrieg die Politik und Gesellschaft in den USA prägte. Dieser Konsens gründete auf einer vergleichsweise langen Phase der Prosperität und umfasste Werte der Mittelklassegesellschaft wie die Herausbildung einer Wohlstandsgesellschaft, den Glauben an eine kapitalistische Wirtschaftsordnung sowie eine Idealisierung der Familie und traditioneller Geschlechterrollen. Gleichzeitig wurde Ideologiefreiheit proklamiert, die allerdings mit einem dezidierten Antikommunismus einherging. Im historischen Rückblick nahm gerade diese öffentlich erklärte Ideologiefreiheit als sogenannte Konsensideologie einen ideologischen Charakter an, der in den USA während der als McCarthyismus bezeichneten antikommunistischen Hysterie (ungefähr von 1947 bis 1954) eine extremistische Zuspitzung erfuhr.<sup>12</sup>

Mit Beginn der 1960er Jahre wurde die politische und soziale Ordnung des *Liberalen Konsens* durch die afroamerikanische Bürgerrechtsbewegung, die Neue Linke, Proteste gegen den Vietnamkrieg sowie die Frauenbewegung immer offensiver herausgefordert. Die Kritik am Modell des *Liberalen Konsens* geriet, wie Manfred Berg schrieb, »leicht in den Geruch des Subversiven, des unpatriotischen *radicalism*«. <sup>13</sup> Damit wurden neben dem Kommunismus auch die Akteure der neuen sozialen Bewegungen Teil des von der US-amerikanischen Mehrheitsgesellschaft gefürchteten Bedrohungsszenarios.<sup>14</sup> Als bekennende Kommunistin, als afroamerikanische Intellektuelle und als Aktivistin in den neuen Protestbewegungen vereinte Angela Davis gleich in mehrfacher Hinsicht jene Feindbilder in sich.<sup>15</sup>

---

Staat und linke Gewalt in der Bundesrepublik und den USA in den 1970er Jahren«, in: *Vierteljahrshefte für Zeitgeschichte*, 2/2012, S. 248–277.

11 »The FBI's Toughest Foe: ›The Kids‹«, in: *Newsweek* (26.10.1970), S. 23. Für eine ähnliche Berichterstattung siehe »The Making of a Fugitive. The Path of Angela Davis«, in: *LIFE Magazine* (11.09.1970).

12 Vgl. Manfred Berg, »Die innere Entwicklung: Vom Zweiten Weltkrieg bis zur Watergate-Krise 1974«, in: Bundeszentrale für politische Bildung (Hg.), *Länderbericht USA: Geschichte, Politik, Wirtschaft, Gesellschaft, Kultur*, Bonn 1998, S. 144–168.

13 Ebenda, S. 150.

14 Ebenda.

15 Im Verlauf der 1970er Jahre kam es aufgrund von sozioökonomischen Reformprozessen, die unter anderem auch durch die sozialen Bewegungen in den vorausgegangenen zwei Dekaden

Für große Teile der afroamerikanischen Bevölkerung wurde Davis gerade deshalb zur Ikone. So schien sie für »Amerikas unterdrückte Schwarze«, wie *Der Spiegel* kurz nach ihrer Verhaftung schrieb, »die zweite amerikanische Revolution, den Aufstand gegen ein System der Ausbeutung und Unterdrückung« zu symbolisieren.<sup>16</sup> Dies galt insbesondere für die *Black Power*-Bewegung, die im Gegensatz zur Bürgerrechtsbewegung der 1950er und 1960er Jahre den Erfolg der Integrationsidee anzweifelte und stattdessen in der politischen, wirtschaftlichen und kulturellen Selbstbestimmung einen Schlüssel für die vollständige Emanzipation der schwarzen Bevölkerung sah. Die Proteste gegen Davis' Verhaftung beschränkten sich allerdings nicht auf die afroamerikanische Gemeinschaft. Angeklagt wegen Mordes, Verschwörung und Geiselnahme hätte Davis bei einer Verurteilung die Todesstrafe erwartet. Nicht zuletzt wegen dieser drohenden Strafe fanden kurze Zeit nach ihrer Verhaftung die ersten rassenübergreifenden Demonstrationen in den USA statt, auf die bald eine weltweite Protestwelle folgte. Die Unterstützer protestierten nicht nur wegen des drohenden Strafmaßes, sondern betrachteten Davis' Fall als Ausdruck von Rassismus und zunehmenden politischen Repressionen in den USA. Davis' Mentor, der Soziologieprofessor Herbert Marcuse, betonte bei einer Protestveranstaltung in Berkeley, sie sei nicht nur »hochintelligent«, sondern auch eine auffallend attraktive Afroamerikanerin, die als bekennende Kommunistin über eine Kombination an Eigenschaften verfüge, die das westlich-kapitalistische System unmöglich tolerieren könne.<sup>17</sup>

Zweifel an der demokratischen Rechtstaatlichkeit der USA wurden nicht nur bei US-amerikanischen Campus-Protesten, sondern auch in der Bundesrepublik Deutschland laut. Hier widmete sich *Der Spiegel* in einer Ausgabe mit dem Titel »Angeklagte Angela Davis. Faschismus in Amerika« der Frage, ob Davis' Fall als erstes Anzeichen dafür zu sehen sei, dass sich beim ehemaligen Befreier Hitlerdeutschlands nun selbst faschistische Tendenzen zeigen würden.<sup>18</sup> Während sich dieser Eindruck freilich nicht uneingeschränkt bestätigen lasse, sei man sich jedoch sicher, dass Davis' Fall eine »Cause célèbre des Jahrhunderts« darstellen würde.<sup>19</sup> Diese Feststellung war jedoch weder »im Sinne herkömmlicher Kriminaljus-

---

den angestoßen worden waren, zu einer umfassenden Transformationsphase, während der auch nationale Identitätsdebatten neu geführt wurden (siehe Beth Bailey/David Farber, »Introduction«, in: Beth Bailey/David Farber (Hg.), *America in the Seventies*, Lawrence 2004, S. 1-8, hier: S. 4; Thomas Borstelmann, *The 1970s. A New Global History from Civil Rights to Economic Inequality*, Princeton 2012, S. 74-121.

16 »Schwarzer Prinz«, in: *Der Spiegel* 43/1970 (19.10.1970).

17 Herbert Marcuse, »Solidaritätsrede Berkeley« (24.10.1969), in: Peter-Erwin Jansen (Hg.), *Herbert Marcuse. Nachgelassene Schriften. Die Studentenbewegung und ihre Folgen*, Bd. 4, Springer 2004, S. 158-164, hier: S. 164.

18 »Angeklagte Angela Davis. Faschismus in Amerika?«, in: *Der Spiegel* 46/1971 (11.08.1971).

19 Ebenda.

tiz«<sup>20</sup> noch auf die Vorwürfe gegen Davis bezogen, stattdessen begründete *Der Spiegel* sie mit der weltweiten Aufmerksamkeit für den Fall. Neben Che Guevara und Mao Zedong wurde Davis zu Beginn der 1970er Jahre – als einzige Frau – zu einer revolutionären Symbolfigur der antiautoritären Jugendproteste.<sup>21</sup>

Dieser antiautoritäre Impetus in Davis' politischer Symbolik lässt die eingangs geschilderte Begegnung mit Honecker selbst vor dem Hintergrund des Antagonismus des Kalten Krieges ungewöhnlich erscheinen. Denn die durch Davis repräsentierte, neue Generation junger linker Radikaler folgte in ihrem revolutionären Kampf weder dem Führungsanspruch noch dem ideologischen Dogma der Sowjetunion. Die Aktivisten der Neuen Linken und schwarze nationalistisch ausgerichtete Gruppen wie die militante *Black Panther Party* (BPP) grenzten sich mit emanzipatorisch-sozialistischen Ideen vom Staatssozialismus, wie er in der DDR zu finden war, ab. Angela Davis' politische Symbolik suggeriert somit nicht, dass sie und die DDR dieselben politisch-ideologischen Ziele verfolgten und sich als Verbündete wahrnahmen. Mit ihrer Nähe zur Neuen Linken und Herbert Marcuse zähle Davis vielmehr zu den Vertretern eines, wie es in der DDR hieß, »Neuen Kommunismus«, mit dem die »bestehende Welt des Sozialismus von links« angegriffen werde.<sup>22</sup> Dennoch organisierte die DDR-Führung eine Solidaritätskampagne für Angela Davis, die nicht nur unter den Staaten des Ostblocks hervorstechen sollte. Auch im Vergleich mit anderen Solidaritätsbekundungen, zum Beispiel in westeuropäischen Ländern, blieben die Unterstützungsaktivitäten der DDR bei der US-Unterstützungsbewegung für Angela Davis besonders in Erinnerung.<sup>23</sup>

Die Unterstützung der DDR-Führung für Angela Davis sowie die folgenden Begegnungen zwischen Davis und der DDR können als klassischer Propagandafall gedeutet werden, der sich als Teil der politischen Herrschaftsgeschichte der DDR erforschen lässt. Gestützt wird diese Interpretation durch die Tatsache, dass die Kampagne für Davis vom DDR-Parteiparat mithilfe der Abteilung Propaganda und Agitation unter der Leitung von Werner Lamberz organisiert wurde. Als eine Form der ideologischen Propaganda sollte sie der Bevölkerung ein spezifisches Welt-, Feind- und Selbstbild vermitteln und damit letztlich dem Machterhalt des Regimes dienen. Die DDR-Solidaritätskampagne für Angela Davis war nach dieser Lesart eine Propagandaaktion, die als ein »auf Machtbildung orientierter Kommunikationsprozess« zur Konstruktion einer speziellen ideologischen

---

20 Ebenda.

21 Vgl. Martin Klimke, *The ›Other‹ Alliance. Student Protest in West Germany and the United States in the Global Sixties*, Princeton 2010, S. 134ff.

22 Harald Wessel, »Inwendig reißende Wölfe. Eine Betrachtung über die politische Funktion des ›neuen Kommunismus‹«, in: *Neues Deutschland* (05.09.1968), S. 5.

23 Shola Lynch, *Free Angela & All Political Prisoners* (Film), USA 2012.

Wirklichkeit beitragen sollte.<sup>24</sup> Wie im Folgenden noch ausführlicher dargestellt wird, waren Solidaritätskampagnen als solche nicht ungewöhnlich, sondern gehörten zur propagandistischen DDR-Routine dazu. Ihnen wurde eine besondere Eignung zur Vermittlung ideologischer Freund-Feind-Vorstellungen zugeschrieben.<sup>25</sup> Dabei vollzog sich »Solidarität«, wie der Historiker Detlev Brunner schreibt, »in einem klaren Rahmen, der sich in die zentralistische Herrschaftspraxis der SED einfügte.«<sup>26</sup>

Wie aber fügten sich Angela Davis und ihre Symbolik als Ikone der *Black Power*-Bewegung und Neuen Linken in die ideologischen Freund-Feind-Vorstellungen der DDR ein? Eine wissenschaftliche Historisierung von Angela Davis, an die diese Arbeit bei der Untersuchung der Frage anknüpfen könnte, steht noch aus. Stattdessen dominiert in der westlichen Erinnerungskultur folgendes Bild von Davis: Eine schwarze Frau mit Afrofrisur, die im Sinne eines »Sweet Black Angels« nicht selten eine revolutionsromantische Idealisierung und exotische Verklärung erfahren hat.<sup>27</sup> Davis selbst kritisierte in diesem Zusammenhang nicht nur einmal, man reduziere ihren politischen Aktivismus auf ihre Frisur: »It is humiliating because it reduces a politics of liberation to a politics of fashion.«<sup>28</sup> Tatsächlich verdeckte Davis' Image als kulturelle Ikone der *Black Power*-Bewegung, die in der öffentlichen Darstellung ihre Versinnbildlichung vor allem in ihrer Afrofrisur gefunden zu haben schien, in der Vergangenheit immer wieder ihre »politische Botschaft«.<sup>29</sup> Was aber war diese politische Botschaft und was verstand Davis unter »politics of liberation«?

Im Mittelpunkt der politischen Botschaft standen weder die antiautoritäre Systemkritik der 68er-Generation noch die militant-separatistischen Ideen der *Black Panthers*, sondern vielmehr, wie Willi Winkler anlässlich ihres siebzigsten Geburtstages in der *Süddeutschen* treffend feststellte, ihr Bekenntnis zum Kommunismus.

24 Vgl. Klaus Arnold, »Propaganda als ideologische Kommunikation«, in: *Publizistik*, 48/1 (2003), S. 63-82, hier: S. 74.

25 Zur Bedeutung des Solidaritätsbegriffs in der politisch-ideologischen Selbstdarstellung der DDR siehe Patrice G. Poutrus, »Die DDR als Hort der internationalen Solidarität. Ausländer in der DDR«, in: Thomas Großbölting (Hg.), *Friedensstaat, Leseland, Sportnation. DDR-Legenden auf dem Prüfstand*, Bonn 2010, S. 134-154.

26 Detlev Brunner, »DDR ›transnational‹. Die ›internationale Solidarität‹ der DDR«, in: Alexander Gallus/Axel Schildt/Detlef Siegfried (Hg.), *Deutsche Zeitgeschichte – transnational*, Göttingen 2015, S. 64-80, hier: S. 66.

27 Das 1972 von den Rolling Stones verfasste Lied »Sweet Black Angel« gilt als politische Hymne auf Davis. Trotzdem spiegelt auch dieses Lied die exotisierte Darstellung Davis' wider.

28 Angela Davis, »Afro Images. Politics, Fashion, and Nostalgia«, in: *Critical Inquiry*, Vol. 21/1 (1994), S. 37-45, hier: S. 37; »Angela Davis laments her legacy as ›a hairdo‹«, in: *The Baltimore Sun* (04.12.1994).

29 Willi Winkler, »Der schwarze Engel der Revolution«, in: *Süddeutsche Zeitung* (25./26.01.2014), S. 14.

Im Jahr 1968 war sie der Kommunistischen Partei der USA (*Communist Party of the USA, CPUSA*) beigetreten und verbrachte dort bis zu ihrem Austritt 1991 viele »prägende Jahre« ihrer politisch-ideologischen Entwicklung, wie sie selbst anlässlich des hundertjährigen Bestehens der CPUSA sagte.<sup>30</sup> So liegt in ihrem Bekenntnis zum Kommunismus auch ein Teil der Antwort auf die Frage, wie sie sich in die ideologischen Freund-Feind-Vorstellungen der DDR einfügen konnte. Gleichzeitig standen jedoch Davis' enge Verbindungen zu Herbert Marcuse und die Vorrangstellung, die sie dem Kampf um politische und soziale Gleichheit der afroamerikanischen Bevölkerung in ihrer politischen Analyse einräumte, dem politisch-ideologischen Leitbild der DDR-Führung und ihrem sowjettreuen, unbeugsamen Glauben an die revolutionäre Führungsrolle der Arbeiterklasse entgegen. Die Kulturwissenschaftlerin Cynthia A. Young spricht daher zurecht von einer »komplizierten politischen und intellektuellen Tradition«, in der Davis' politisch-ideologische Positionen Ende der 1960er und zu Beginn der 1970er Jahre stehen, wobei Young auch auf die Verflechtung sich zum Teil widersprechender Positionen anspielt.<sup>31</sup>

Aktuelle erinnerungskulturelle Beiträge zu Angela Davis, wie die 2012 erschienene Dokumentation von Shola Lynch mit dem Titel »Free Angela & All Political Prisoners«, die Davis' Fall nachzeichnet, sowie der Dokumentarfilm »The Black Power Mixtape« (2011) sind in Bezug auf diese »komplizierte politische und intellektuelle Tradition« ebenfalls nur begrenzt aufschlussreich.<sup>32</sup> Die Filme betonen Davis'

---

30 Angela Davis, »Angela Davis praises CPUSA for its history ›of militant struggle‹«, in: *People's World* (20.06.2019).

31 In ihrer Untersuchung der Bedeutung der Dritten Welt für die US-Linke in den 1970er Jahren beleuchtet Cynthia A. Young in einem Kapitel Davis' Rolle im Zusammenhang mit dem aufkommenden Dritte-Welt-Aktivismus dieser Jahre (vgl. Cynthia A. Young, *Soul Power. Culture, Radicalism, and the Making of a US Third World Left*, Durham 2006, S. 184-208, hier: S. 185). Hierzu außerdem Kimberly N. Brown, *Writing the Black Revolutionary Diva. Women's Subjectivity and the Decolonizing Text*, Bloomington 2010, S. 112-149; Joy James (Hg.), *The Angela Y. Davis Reader*, Malden 2008.

32 Göran Hugo Olsson, *The Black Power Mixtape 1967-1975* (Film), Schweden 2011; Shola Lynch, *Free Angela & All Political Prisoners* (Film), USA 2012. Außerdem: Yolanda Du Luart, *Angela Davis: Portrait of a Revolutionary* (Film), USA 1972; Christel Priemer/Ingeborg Weber, *Angela Davis. Eine Legende lebt* (Film), Deutschland 1998. Für eine wissenschaftliche Rezension siehe zum Beispiel Simon Wendt, »The Black Power Mixtape 1967-1975. Dir. by Göran Hugo Olsson. Prod. by Annika Rogell, Joslyn Barnes, and Danny Glover. Louverture Films, 2011«, in: *Journal of American History*, 99/1 (2012), S. 380-382. Bereits kurz nach dem Ende des Prozesses entstanden Versuche, Davis' Aktivismus und Prozess zu interpretieren. Sie bieten bezüglich der Frage nach Davis' politisch-ideologischem Selbstentwurf keine wissenschaftlichen Antworten und lassen sich nur als Beispiele für das Spektrum an zeitgenössischen Rezeptionen des Davis-Falls verwenden. Beispiele hierfür sind: Regina Nadelson, *Who is Angela Davis. The Biography of a Revolutionary*, New York 1972; Blythe F. Finke, *Angela Davis. Traitor or Martyr of the Freedom of Expression*, Charlottesville 1972 und Mary Timothy, *Jury Woman. The Story of the Trial of Angela Y. Davis – Written by a Member of the Jury*, San Francisco 1974.

Bedeutung als Leitfigur der *Black Power*-Ära und porträtieren sie als Leuchtfeuer im afroamerikanischen Kampf für politische und soziale Freiheit, Gleichheit und Gerechtigkeit, während Davis selbst als Zeitzeugin der facettenreichen Geschichte dieser Ära zu Wort kommt. Beide Dokumentationen folgen mit ihren Darstellungen dem aktuellen Stand der Forschung, wonach sich die *Black Power*-Bewegung vor allem durch ihre Heterogenität auszeichnet.<sup>33</sup> Allerdings finden Davis' marxistisch-leninistische Positionen und die speziellen Implikationen, die diese für die Gestaltung des schwarzen Freiheits- und Gleichheitskampfes mit sich brachten, in den unzähligen Betrachtungen ihres Lebens nur am Rande Erwähnung, obwohl sie durchaus als Beispiel für die Heterogenität von *Black Power* stehen könnten.<sup>34</sup>

Ungeachtet dieser Lücken wird aber auch in den Betrachtungen deutlich, dass sich Davis mit ihrem politisch-ideologischen Selbstentwurf nicht problemlos in die Freund-Feind-Vorstellungen der DDR-Regierung einfügte. Gleichzeitig stellt sich die Frage, wie sich ihre Identifikation mit *Black Power* und ihre Mitgliedschaft in der CPUSA vereinbaren lassen und wie es dazu kam, dass Davis die DDR mit ihrem orthodoxen Parteisozialismus als Verbündeten im afroamerikanischen Freiheitskampf wahrnahm. Vor diesem Hintergrund lassen sich für die vorliegende Untersuchung folgende erkenntnisleitende Fragestellungen formulieren:

- In welchen Bedeutungszusammenhang bettete das SED-Regime Angela Davis, ihren Fall und ihren Aktivismus ein?
- Welche Vorstellungswelten und kollektiven Sinngebungen standen dafür während der ersten Hälfte der 1970er Jahre zur Verfügung oder wurden bereitgestellt?
- Welche politisch-ideologischen Prägungen leiteten Angela Davis' Wahrnehmungs- und Handlungshorizont vor allem in der Zeit nach ihrem ersten Besuch in der DDR im Jahr 1965 bis in die Mitte der 1970er Jahre?
- Auf welchem politisch-ideologischen Identitätselfentwurf basierte Davis' Verbundenheit mit der DDR?

Ausgehend von diesen Überlegungen liegt der vorliegenden Untersuchung die These zugrunde, dass die Verbindung zwischen der DDR und Angela Davis nicht ausschließlich auf der Propaganda des Kalten Krieges aufbaute, sondern ein transnationales kommunistisch-afroamerikanisches Bündnis im gemeinsamen Kampf

---

33 Für einen historiografischen Überblick siehe Peniel E. Joseph, »The Black Power Movement: A State of the Field«, in: *The Journal of American History*, 96/3 (2009), S. 751-776.

34 Eine solche Vernachlässigung der multidimensionalen Interpretation der *Black Power*-Bewegung kritisiert auch Wendt, »The Black Power Mixtape 1967-1975«, S. 381.

gegen Rassismus und Imperialismus darstellte, das mit der Vorstellung einer besonderen Solidarität zwischen Kommunisten und Afroamerikanern einherging.<sup>35</sup>

Zur Beantwortung der erkenntnisleitenden Fragestellungen wird ein gesellschafts- und kulturgeschichtlicher Erklärungsansatz herangezogen. Mit einem solchen Zugang lassen sich ideologische Denkmuster und politische Vorstellungswelten in den Blick nehmen, die beide Seiten des kommunistisch-afroamerikanischen Bündnisses prägten und eine gegenseitige Wahrnehmung als Verbündete überhaupt erst möglich werden ließen.<sup>36</sup> Diesem Vorgehen liegt die Annahme zugrunde, dass die als Kalter Krieg bezeichnete Blockkonfrontation zwischen Ost und West nicht nur als geopolitische Konfliktsituation zu verstehen ist, sondern auch über eine gesamtgesellschaftliche Dimension verfügt.<sup>37</sup> Bei der Untersuchung dieser Dimension richtete sich der Forschungsfokus bisher meist auf einen abgegrenzten thematischen Bereich jenseits politischer, ökonomischer oder sozialer Handlungsfelder. Untersucht wurden dabei die kulturpolitische Propaganda und die Frage, wie etwa Kulturpolitik und Intellektuelle in den Wettlauf der beiden Supermächte eingebunden und so unterschiedliche kulturelle Gattungen wie Belletristik, Musik, Ballett, Film oder Design und die Massenmedien für die Austragung des Systemkonflikts nutzbar gemacht wurden.<sup>38</sup> Die gesellschaftliche Dimension

- 
- 35 Als transnational werden hier diejenigen Austauschprozesse und Interaktionen verstanden, »die über Grenzen hinweg agieren und dabei gewisse über den Nationalstaat hinausgehende Strukturmuster« ausbilden. Hartmut Kaelble/Martin Kirsch/Alexander Schmidt-Gernig, »Zur Entwicklung transnationaler Öffentlichkeiten und Identitäten im 20. Jahrhundert. Eine Einleitung«, in: Hartmut Kaelble/Martin Kirsch/Alexander Schmidt-Gernig (Hg.), *Transnationale Öffentlichkeiten und Identitäten im 20. Jahrhundert*, Frankfurt 2002, S. 7-33, hier: S. 9. Außerdem: David Thelen, »The Nation and Beyond: Transnational Perspectives on United States History«, in: *Journal of American History*, 86/3 (1999), S. 965-975; Kiran Klaus Patel (Hg.), *Nach der Nationalfixiertheit. Perspektiven einer transnationalen Geschichte*, Berlin 2004; Gunilla Budde/Sebastian Conrad/Oliver Janz (Hg.), *Transnationale Geschichte: Themen, Tendenzen und Theorien*, Göttingen 2006; Kahraman, Sanjeev/Peggy Levitt (Hg.), *The Transnationalism Studies Reader. Intersections and Innovations*, London 2007; Katherine Pence/Andrew Zimmerman, »Transnationalism«, in: *German Studies Review*, 35/3 (2012), S. 495-500.
- 36 Dies bedeutet auch eine »Erweiterung des Blickfeldes« auf die Adressaten der Propaganda (vgl. Rainer Gries, »Zur Ästhetik und Architektur von Propagenden. Überlegungen zu einer Propagandageschichte als Kulturgeschichte«, in: Rainer Gries/Wolfgang Schmale (Hg.), *Kultur der Propaganda*, Bochum 2005, S. 9-36).
- 37 Vgl. Melvyn P. Leffler/Odd Arne Westad (Hg.), *The Cambridge History of the Cold War*, 3 Bd., Cambridge 2010; John Lewis Gaddis, *Der Kalte Krieg. Eine Neue Geschichte*, München 2007; Bernd Stöver, *Der Kalte Krieg 1947-1991. Geschichte eines radikalen Zeitalters*, München 2007.
- 38 Greg Castillo, *Cold War on the Home Front. The Soft Power of Midcentury Design*, Minneapolis 2010; David Crowley, *Cold War Modern. Design 1945-1970*, London 2008; David Caute, *The Dancer Defects. The Struggle for Cultural Supremacy during the Cold War*, Oxford 2003; Andrew Hammond (Hg.), *Global Cold War Literature. Western, Eastern and Postcolonial Perspectives*, New York 2011; Thomas Lindenberger (Hg.), *Massenmedien im Kalten Krieg. Akteure, Bilder, Resonanz*, Köln 2006; Tim B. Müller, *Krieger und Gelehrte. Herbert Marcuse und die Denksysteme im Kalten*

des Kalten Krieges ging jedoch über kulturpolitische Propaganda und einschlägige, dem Kulturbegriff zugeordnete Bereiche wie Musik oder Literatur hinaus.<sup>39</sup> Vielmehr ist anzunehmen, dass Solidaritätskampagnen wie jene für Angela Davis aufgrund des Gestaltungsanspruchs der SED-Führung und des ihr unterstellten Staatsapparates jenseits ihrer propagandistischen Funktion auch lebensweltliche Folgen hatten und mit gesellschaftlichen Verinnerlichungsprozessen im DDR-Alltag verbunden werden können.<sup>40</sup>

Der Historiker Martin Sabrow bezeichnete diese Verinnerlichungsprozesse in der Alltagswelt der DDR als »komplementäre Rückseite« von Herrschaft, deren Untersuchung zu einem besseren Verständnis der SED-Diktatur beitragen könne.<sup>41</sup> Zu solchen Verinnerlichungsprozessen gehört die Aneignung von gesellschaftlichen Werten, Sitten, Normen und sozialen Rollen im Rahmen der Sozialisierung.<sup>42</sup> Es ist davon auszugehen, dass die DDR-Führung mit der Vermittlung des moralischen Wertes der internationalen Solidarität auch eine spezifische sozialistische Sozialisierung und folglich gesellschaftliche Integration zur Stärkung der Legitimität ihrer Herrschaft anstrebte. Der Fokus richtet sich hier auf die mit der Solidaritätskampagne ideologisch intendierten Deutungs- und Durchdringungsmechanismen und entsprechende kollektive Aneignungsprozesse. Deshalb wird die

---

Krieg, Hamburg 2010; Uta G. Poiger, *Jazz, Rock, and Rebels. Cold War Politics and American Culture in a Divided Germany*, Berkeley 2000; Tony Shaw, *Hollywood's Cold War*, Edinburgh 2007; Frances Sonor Saunders, *The Cultural Cold War. The CIA and the World of Arts and Letters*, New York 2000; Tony Shaw/Denise Jeanne Youngblood, *Cinematic Cold War. The American and Soviet Struggle for Hearts and Minds*, Lawrence 2010.

39 Patrick Major/Rana Mitter (Hg.), *Across the Blocks. Cold War Culture and Social History*, London 2004; Bernd Greiner/Tim B. Müller/Claudia Weber (Hg.), *Macht und Geist im Kalten Krieg*, Hamburg 2011; Annette Vowinckel/Marcus M. Payk/Thomas Lindenberger (Hg.), *Cold War Cultures. Perspectives on Eastern and Western European Societies*, New York 2012; Patrick Bernhard/Holger Nehring (Hg.), *Den Kalten Krieg denken. Beiträge zur sozialen Ideengeschichte nach 1945*, Essen 2014.

40 Brunner, »DDR ›transnational‹«, S. 66. Brunner bewertet hier die im Zusammenhang mit der Debatte um die »Zukunft der DDR-Geschichte« gemachte Feststellung, der »proletarische Internationalismus« und »die Parole der ›Völkerfreundschaft‹« habe für die Mehrheit der DDR-Bevölkerung keine lebensweltlichen Folgen gehabt, als »nicht abschließend befriedigend«. Die Feststellung, auf die sich Brunner hier bezieht, findet sich in Henrik Bispinck et al., »Die Zukunft der DDR-Geschichte. Potentiale und Probleme zeithistorischer Forschung«, in: *Vierteljahresschrift für Zeitgeschichte* 53/4 (2005), S. 547–570, hier: S. 567.

41 Martin Sabrow, »Sozialismus als Sinnwelt. Diktatorische Herrschaft in kulturhistorischer Perspektive«, in: Martin Sabrow (Hg.), *Zeiträume. Potsdamer Almanach des Zentrums für Zeithistorische Forschung* 2007, Göttingen 2008, S. 164–181, hier: S. 171.

42 Überlegungen zur Bedeutung von Verinnerlichung und Adaption von Werten und Normen für die Integration von Individuen finden sich schon bei Emile Durkheim oder in Talcott Parsons strukturfunktionaler Systemtheorie. Der Soziologe Emile Durkheim ging davon aus, die Internalisierung von Werten und Normen könne zur Integration von Individuen beitragen.

Verinnerlichung von internationaler Solidarität im Kontext der Kampagne für Angela Davis im Rahmen dieser Arbeit nicht auf individueller Ebene untersucht und es werden somit keine Aussagen über die Bedeutung der Kampagne in der individuellen Wahrnehmung einzelner Beteiligter getroffen.

Zur Erfassung der ideologisch intendierten Deutungs- und Durchdringungsmechanismen und der entsprechenden kollektiven Aneignungsprozesse werden die Empfänger des propagandistischen Kommunikationsprozesses aber auch nicht nur als passive Masse verstanden. Es ist vielmehr anzunehmen, dass sich erst unter Beachtung der kulturellen, sozialen oder politischen Bedürfnislagen unterschiedlicher Bevölkerungsgruppen sowie ihrer Deutung durch das Parteiregime die mit der Solidaritätskampagne kommunizierte Botschaft und mögliche kollektive Verinnerlichungsprozesse in der Alltagswelt erfassen lassen. Im Fall der Solidaritätskampagne für Angela Davis berücksichtigt die vorliegende Untersuchung besonders die gesellschaftliche Gruppe der Jugendlichen.<sup>43</sup> Dabei wird auf den von der SED verwendeten Begriff der Jugend zurückgegriffen, der Heranwachsende im Alter zwischen 14 bis 25 Jahren einschließt.<sup>44</sup>

Um die gesellschaftliche Durchdringung der DDR im Kontext der Solidaritätsbemühungen des SED-Regimes für Angela Davis zu erfassen, werden nicht nur Ereignisse und Akteure untersucht, sondern auch symbolische Systeme und Strukturen. Dabei stützt sich diese Arbeit auf einen breit gefassten, bedeutungsorientierten Kulturbegriff, der laut dem Kulturwissenschaftler Andreas Reckwitz »symbolische Ordnungen, kulturelle Codes und Sinnhorizonte« erfassen kann, durch die Gesellschaften bestimmt werden.<sup>45</sup> Demnach bildet sich Kultur aus einer Gesamtheit von Praktiken und Wirklichkeitsdeutungen. Kulturelles Handeln ist demnach als »symbolische Organisation der Wirklichkeit« zu verstehen.<sup>46</sup> Gesellschaften bewegen sich dabei, wie die Kulturhistoriker Tschopp und Weber es formulieren, »in doppeltem Sinn in einem Spannungsfeld von Identität und Alterität, von Eigenem

---

43 Die vorliegende Untersuchung folgt dem klassischen Modell von Sender und Empfänger, wobei von einer einseitigen/asymmetrischen Kommunikation vonseiten der Herrschenden ausgegangen wird. Allerdings nimmt die Untersuchung die Seite der Empfänger auch als aktive – statt ausschließlich passive – Akteure in den Blick. Von Interesse ist dabei die gezielte, strategische Aktivierung von Aktivität auf Seiten der Empfänger (siehe hierzu: Silke Satjukow/Rainer Gries, »Feindbilder des Sozialismus. Eine Theoretische Einführung«, in: Silke Satjukow/Rainer Gries (Hg.), *Unsere Feinde. Konstruktionen des Anderen im Sozialismus*, Leipzig 2004, S. 13-75, hier: S. 25).

44 Siehe hierzu Wiebke Janssen, *Halbstarke in der DDR. Verfolgung und Kriminalisierung einer Jugendkultur*, Berlin 2010, S. 33ff.

45 Andreas Reckwitz, »Die Kontingenzperspektive der ›Kultur‹. Kulturbegriff, Kulturtheorien und das kulturwissenschaftliche Forschungsprogramm«, in: Friedrich Jaeger, Jörn Rüsen (Hg.), *Handbuch der Kulturwissenschaft*, Bd. 3, Stuttgart 2004, S. 1-20, S. 2.

46 Ebenda, S. 7. Außerdem: Heonik Kwon, *The Other Cold War*, New York 2010, S. 152.

und Fremdem.«<sup>47</sup> In Bezug auf die DDR und Angela Davis bildet dieser Kulturbegriff die Grundlage für die Erfassung von Welt- und Wirklichkeitsdeutungen, welche die DDR und Davis möglicherweise miteinander teilten und mit denen sich die Vorstellung einer gegenseitigen Verbundenheit vor dem Hintergrund der bipolaren Lagerbildung des Kalten Krieges, aber auch über Rassenschranken hinweg erklären ließen.

Bereits kurz nach dem Ende des Ost-West-Konflikts hat Mary Kaldor mit dem Begriff »imaginary war« versucht, den bipolaren Systemkonflikt als eine Epoche greifbar zu machen, die stark vom Imaginären mitgeprägt war.<sup>48</sup> Gerade mit Blick auf Ost- und Westeuropa, wo nicht reale kriegerische Auseinandersetzungen, sondern militärische Aufrüstung, aggressive Kampfreden, rigide Organisations- und Kontrollmechanismen sowie nicht zuletzt die ständig aktualisierte Kriegsangst den Kalten Krieg nährten, sei der Begriff des »imaginären Krieges« aufschlussreich.<sup>49</sup> Betrachtet man Europa – Ähnliches lässt sich zu einem gewissen Grad auch für die USA sagen –, handelte es sich beim Kalten Krieg demnach um einen Konflikt, dessen Dauer maßgeblich durch die Vorstellungskraft der Menschen genährt wurde. Der Konflikt zwischen Ost und West konnte folglich auch deshalb so lange andauern, weil das »gesellschaftlich Imaginäre«, das sich beispielsweise in Form von Bedrohungsmetaphern, Feindbildern, kollektiv wirksamen Emotionen und apokalyptischen Szenarien äußerte, den Systemkonflikt permanent reproduzierte und damit neben der militärischen auch eine mentale Abrüstung erschwerte.<sup>50</sup> Somit bietet der Begriff des politisch und gesellschaftlich Imaginären, verstanden als kollektive Sinngebungen und symbolische Deutungsmuster, einen geeigneten Zugang für die Untersuchung der Verbindung zwischen der DDR und Angela Davis sowie

---

47 Silvia Serena Tschopp/Wolfgang E. J. Weber, *Grundfragen der Kulturgeschichte*, Darmstadt 2007, S. 51.

48 Mary Kaldor versteht einen solchen *Imaginary War* basierend auf Foucault als eine »Disziplinierungstechnik«, bei der es sich um einen Wahrheitsdiskurs handelt, der »Machtverhältnissen in modernen Gesellschaften Ausdruck und Legitimation verleiht.« (Mary Kaldor, *Der Imaginäre Krieg. Eine Geschichte des Ost-West-Konflikts*, Hamburg 1992, S. 20. Außerdem: Guy Oakes, *The Imaginary War. Civil Defense and American Cold War Culture*, New York 1994). Patrick Bernhard, Holger Nehring und Anne Rohstock sprechen in ähnlicher Weise vom Kalten Krieg als einem simulierten Krieg, wobei »im politischen Handeln des Westens die Sicherung von Demokratie und Marktwirtschaft gegen die vermeintliche allgegenwärtige Bedrohung durch den Staatssozialismus osteuropäischer Provenienz zu einer beinahe alles beherrschenden Leitidee« wurde (siehe Patrick Bernhard/Holger Nehring/Anne Rohstock, »Der Kalte Krieg im langen 20. Jahrhundert. Neue Aufsätze, Befunde und Perspektiven«, in: Bernhard/Nehring (Hg.), *Den Kalten Krieg denken*, S. 11-39, hier: S. 11-12.

49 Kaldor, *Der Imaginäre Krieg*, S. 20.

50 Siehe David Eugster/Sibylle Marti, »Einleitung. Das Imaginäre des Kalten Krieges«, in: David Eugster/Sibylle Marti (Hg.), *Das Imaginäre des Kalten Krieges. Beiträge zu einer Kulturgeschichte des Ost-West-Konfliktes in Europa*, Essen 2015, S. 3-16, hier: S. 5.

der DDR-Solidaritätskampagne für Angela Davis. Hierbei, so die These, gewann das Imaginäre im Sinne eines kommunistisch-afroamerikanischen (»rot-schwarzen«) Verbundenheitsgefühls an Wirksamkeit für die bipolare Wirklichkeitsdeutung im Kontext des Kalten Krieges.

Um zu untersuchen, wie sich die Idee einer solchen kommunistisch-afroamerikanischen Verbundenheit in Davis' teils ambivalente politisch-ideologische Entwicklung und dementsprechend in ihre Selbst- sowie auch Weltdeutung einfügte, wirft diese Arbeit einen biografischen Blick auf die Ereignisse. Die Begegnungen zwischen Davis und der DDR werden dadurch zu einem Brennglas, durch das ein schärferes Bild sowohl von Davis' politisch-ideologischem Identitätsskizzen innerhalb des afroamerikanischen Freiheitskampfes der 1960er und 1970er Jahre als auch von den antirassistischen Solidaritätsbemühungen des SED-Regimes für afroamerikanische Aktivistinnen zu dieser Zeit gezeigt wird. Unter dem Begriff Identität wird hier jenes »Bündel von Wahrnehmungs- und Deutungsschemata, Selbstdefinition und Zugehörigkeitsgefühlen, Wertideen und Normen, Orientierungen und Loyalitäten« verstanden, aus dem sich die Vorstellung von Ich, Gesellschaft und Welt zusammensetzt.<sup>51</sup>

Außerdem wird eine zeitlich breitere Untersuchungsperspektive zugrunde gelegt, um einerseits die Besonderheiten der DDR-Solidaritätskampagne für Angela Davis sowie Davis' Verbundenheit mit der DDR deutlich zu machen, andererseits aber auch Kontinuitäten zwischen der DDR-Solidaritätskampagne für Angela Davis und früheren Begegnungen zwischen afroamerikanischen Kommunisten und der Sowjetunion aufzeigen zu können. Die Verbindungen zwischen Davis und der DDR werden mit bis in die 1920er Jahre zurückreichenden Beziehungen zwischen linken Aktivistinnen des afroamerikanischen Freiheitskampfes und europäischen Kommunisten verknüpft. Diese älteren Beziehungen können als soziales und ideologisches Netzwerk beschrieben werden, das namhafte afroamerikanische Aktivistinnen und Aktivistinnen wie W.E.B. Du Bois und Paul und Eslanda Robeson, aber auch schwarze Kommunisten und Kommunistinnen wie den CPUSA-Vorsitzenden Henry Winston, James E. Jackson (zuständig für die Außenbeziehungen der CPUSA) und dessen Frau Esther Cooper Jackson (Herausgeberin des afroamerikanischen Magazins *Freedomways*) umfasste. Dieses Aktivistinnen-Netzwerk – einschließlich seiner politisch-ideologischen Ausrichtung sowie seiner Beziehungen zur Sowjetunion und zur DDR – wird in die Untersuchung eingebunden. Dabei wird an-

---

51 Volker Depkat, »Autobiographien und die soziale Konstruktion von Wirklichkeit«, in: *Geschichte und Gesellschaft*, 29 (2003), S. 441-476, hier: S. 466. Die Identitätsbildung setzt Selbst- und Fremddefinition in ein Verhältnis zueinander, sie ermöglicht die Integration des Einzelnen in größere Gruppen und macht so sinnvolles Handeln in der Gesellschaft erst möglich (vgl. hierzu: Peter L. Berger/Thomas Luckmann, *Die gesellschaftliche Konstruktion der Wirklichkeit. Eine Theorie der Wissenssoziologie*, Frankfurt 1980, S. 185-195).

genommen, dass Angela Davis' politisch-ideologisches Denken und Handeln bereits seit ihrer Kindheit von diesen schwarzen linken Internationalisten geprägt waren und diese Prägung in ihre Vorstellung des afroamerikanischen Freiheitskampfes sowie in ihr Verständnis von *Black Power* zu Beginn der 1970er Jahre einfließ.

Zur Untersuchung der Verbindungen zwischen Angela Davis und der DDR wird außerdem die Kategorie *race* genutzt. Nach dem US-Historiker George Fredrickson entfaltet *race* immer dann Wirkung, sobald ethnische Zugehörigkeit als essenziell oder unauslöschlich erachtet oder hierarchisch bewertet wird.<sup>52</sup> Weil solche Rassenvorstellungen reale Auswirkungen nach sich ziehen, ist *race* vor allem in der US-amerikanischen Forschung zu einer wichtigen Analysekatégorie geworden.<sup>53</sup> Entsprechend dieser Anwendung als Analysekatégorie wird der Rassebegriff in der vorliegenden Untersuchung als soziale Konstruktion und nicht als objektive Tatsache verstanden.<sup>54</sup> So werden Formen der Selbst- und Fremdzuschreibung im Rahmen der DDR-Solidaritätskampagne für Angela Davis und auch kollektive Identitätsbildungsprozesse im Zusammenhang mit der Entstehung eines kommunistisch-afroamerikanischen Verbundenheitsgefühls unter Rückgriff auf die Kategorie *race* analysiert.

Zur Beantwortung der erkenntnisleitenden Fragestellungen sind Untersuchungen und Debatten von Bedeutung, die ein kulturwissenschaftliches Forschungsinteresse mit einer internationalen oder transnationalen Perspektive sowohl auf die Geschichte des afroamerikanischen Freiheits- und Gleichheitskampfes als auch auf die Geschichte der DDR verbinden. Mit diesem Ansatz fügt sich die Verbindung zwischen Angela Davis und der DDR zum einen in die internationale Geschichte des modernen Kampfes für Rassengerechtigkeit ein, die unter anderem von Wissenschaftlerinnen und Wissenschaftlern wie Brenda Gayle Plummer, Mary Dud-

52 George M. Fredrickson, *Rassismus. Ein historischer Abriss*, Hamburg 2004, S. 157.

53 Nancy Foner/George M. Fredrickson, »Immigration, Race, and Ethnicity in the United States. Social Constructions and Social Relations in Historical and Contemporary Perspective«, in: Nancy Foner, George M. Fredrickson (Hg.), *Not Just Black and White: Historical and Contemporary Perspectives on Immigration, Race, and Ethnicity in the United States*, New York 2004, S. 1-22. Für die Verwendung von »Rasse« als analytische Katégorie sowie zur Untersuchung der US-Rassenbeziehungen aus transnationaler Perspektive siehe Simon Wendt, »Transnational Perspectives on the History of Racism in North America«, in: *Amerikastudien*, 54/3 (2009), S. 473-498; Manfred Berg/Paul Schor/Isabel Soto, »The Weight of Words. Writing about Race in the United States and Europe«, in: *American Historical Review*, 119/3 (2014), S. 800-808.

54 Dabei kann keine deutliche Unterscheidung zwischen »Rasse« und Ethnizität getroffen werden. Um den sozial konstruierten Charakter von »Rasse« zu verdeutlichen, wird »Rasse« im Weiteren in Anführungszeichen gesetzt. Zur Problematik der Verwendung des Begriffs als Analysekatégorie im Deutschen siehe ebenda, S. 802.

ziak, Penny van Eschen oder Kevin Gaines ausführlich untersucht wurde.<sup>55</sup> Durch deren Arbeiten wurden die afroamerikanische Bürgerrechtsbewegung und der US-amerikanische Rassenkonflikt als ein bestimmender Faktor der US-Außenpolitik sichtbar, gleichzeitig gewannen afroamerikanische Bürgerrechtsaktivisten als internationale Akteure vor dem Hintergrund des Kalten Krieges an Bedeutung. Zum anderen rückte aber ebenso die Bedeutung globaler Entwicklungen wie der Zweite Weltkrieg, die Dekolonialisierung oder der Kalte Krieg als Einflussgröße für den schwarzen Freiheitskampf in den USA in den Mittelpunkt des Forschungsinteresses.<sup>56</sup>

Hinzu kam außerdem, dass führende schwarze Aktivisten und Aktivistinnen Rassismus als einen Gegner mit globaler Reichweite sahen, weshalb sie ihren Kampf nicht auf den sogenannten Jim-Crow-Süden<sup>57</sup> oder die USA beschränk-

---

55 Brenda Gayle Plummer, *Rising Wind: Black Americans and US foreign affairs, 1935-1960*, Chapel Hill 1996; Manfred Berg, »Ein amerikanisches Dilemma. Die Rassenfrage und der Kalte Krieg«, in: Manfred Berg et al. (Hg.), *Macht und Moral. Beiträge zur Ideologie und Praxis amerikanischer Außenpolitik im 20. Jahrhundert*, Münster 1999, S. 189-207; Azza Salama Layton, *International Politics and Civil Rights Politics in the United States, 1941-1960*, Cambridge 2001; Mary L. Dudziak, *Cold War Civil Rights. Race and the Image of American Democracy*, Princeton 2000; Brenda Gayle Plummer (Hg.), *Window on Freedom. Race, Civil Rights, and Foreign Affairs, 1945-1988*, Chapel Hill 2003; Jonathan Rosenberg, *How far the Promised Land? World Affairs and the American Civil Rights Movement from the First World War to Vietnam*, Princeton 2006; Kevin K. Gaines, »The Civil Rights Movement in World Perspective«, in: Gary W. Reichard/Ted Dickson (Hg.), *America on the World Stage: A Global Approach to U.S. History*, Urbana 2008, 189-207.

56 Dazu zählen: Kobena Mercer, *Welcome to the Jungle: New Positions in Black Cultural Studies*, New York 1994; Paul Gilroy, *The Black Atlantic. Modernity and Double Consciousness*, Cambridge 1995; Penny M. von Eschen, *Race Against Empire. Black Americans and Anticolonialism, 1937-1957*, Ithaca 1997; Marc S. Gallicchio, *The African-American Encounter with Japan and China. Black Internationalism in Asia, 1895-1945*, Durham 2000; James H. Meriwether, *Proudly We Can Be Africans. Black Americans and Africa, 1935-1961*, Chapel Hill 2002; Rosenberg, *How Far the Promised Land?*; Manning Marable/Vanessa Agard-Jones, *Transnational Blackness. Navigating the Global Color Line*, New York 2008; Gerald Horne, *The End of Empire. African Americans and India*, Philadelphia 2008; Gerald Horne, *Mau Mau in Harlem? The U.S. and the Liberation of Kenya*, New York 2009; Michael O. West et al. (Hg.), *From Toussaint to Tupac. The Black International since the Age of Revolution*, Chapel Hill 2009. Für einen historiografischen Überblick der Forschung über transnationale und internationale Verbindungen von Afroamerikanern und Afroamerikanerinnen siehe auch Gerald Horne, »Toward a Transnational Research Agenda for African American History in the 21st Century«, in: *Journal of African American History*, 91/3 (2006), S. 288-303. Zur internationalen Dimension der *Black Panther Party* siehe Michael L. Clemons/Charles E. Jones, »Global Solidarity. The Black Panther Party in the International Arena«, in: Kathleen Cleaver/George Katsiaficas (Hg.), *Liberation, Imagination, and the Black Panther Party*, New York 2001, S. 20-39; Kathleen Cleaver, »Back to Africa. The Evolution of the International Section of the Black Panther Party (1969-1972)«, in: Charles E. Jones (Hg.), *The Black Panther Party Reconsidered*, Baltimore 2005, S. 211-254.

57 Der Name »Jim Crow« geht auf die stereotype Figur eines naiven, einfältigen, ständig fröhlichen Schwarzen zurück, der in sogenannten Minstrel Shows in den USA des späten 19.

ten.<sup>58</sup> Sie definierten den afroamerikanischen Kampf für Freiheit und Gleichheit innerhalb des größeren Kontextes der Bekämpfung kolonialer Unterdrückung nicht-weißer Menschen weltweit, wobei sie ein besonderes Interesse an Afrika antrieb.<sup>59</sup> Diesem durch panafrikanische Theorien beeinflussten schwarzen Internationalismus mit Fokus auf Afrika widmeten sich in den letzten beiden Jahrzehnten diverse Forschungsbeiträge.<sup>60</sup>

Zu den Arbeiten über die internationale Geschichte des afroamerikanischen Freiheitskampfes zählen auch Schriften, die die Verschränkungen zwischen dem schwarzen Freiheitskampf in den USA und der Geschichte des Kommunismus sowohl in den USA als auch auf internationaler Ebenen beleuchten. Hier sind über die letzten drei Jahrzehnte eine Vielzahl von Beiträgen über die Geschichte linker afroamerikanischer Aktivistinnen und Aktivistinnen und ihrer Verbindungen zum Kommunismus entstanden. Arbeiten wie die von Manning Marable, Gerald Horne, Robin D.G. Kelley oder auch Glenda Gilmore richten ihren Fokus dabei vor allem auf die Rolle, die linke Radikale und die CPUSA für die Erfolge des afroamerikanischen Freiheitskampfes spielten.<sup>61</sup> Die CPUSA erscheint in diesen Darstellungen

---

Jahrhunderts von schwarz angemalten, weißen Schauspielern dargestellt wurde. Nach dem Ende der Sklaverei setzten ab den 1870er Jahren bis zur gesetzlichen Gleichstellung afroamerikanischen Bevölkerung durch den Civil Rights Act (1964) und den Voting Rights Act (1965) sogenannte Jim-Crow-Gesetze die Rassentrennung in den US-Südstaaten weiter durch. »Jim Crow« wurde dadurch zu einem Synonym für die rassistische Segregation im US-amerikanischen Süden.

- 58 Marilyn Lake/Henry Reynolds, *Drawing the Global Colour Line. White Men's Countries and the International Challenge of Racial Equality*, Cambridge 2008. Für eine wissenschaftliche Auseinandersetzung mit Rassismus als globalem Phänomen siehe den Sammelband Manfred Berg/Simon Wendt (Hg.), *Racism in Modern World: Historical Perspectives on Cultural Transfer and Adaptation*, New York 2011.
- 59 Judith Stein, *The World of Marcus Garvey. Race and Class in Modern Society*, Baton Rouge 1986; Robin D. G. Kelley, »But a Local Phase of a World Problem«. Black History's Global Vision, 1883-1950«, in: *Journal of American History*, 86/3 (1999), S. 1045-1077; David Levering Lewis, *W.E.B. Du Bois. Biography of a Race 1868-1919*, New York 1993; David Levering Lewis, *W.E.B. Du Bois. The Fight for Equality and the American Century 1919-1963*, New York 2001; Colin Grant, *Negro with a Hat. The Rise and Fall of Marcus Garvey and His Dream of Mother Africa*, London 2009.
- 60 Dazu zählen William R. Scott, *The Sons of Sheba's Race. Afro-Americans and the Italo-Ethiopian War, 1935-1941*, Bloomington 1993; Carol Anderson, *Eyes off the Prize. African Americans, the United Nations, and the Struggle for Human Rights, 1944-1955*, New York 2003; Francis Njubi Nesbitt, *Race for Sanctions. African American Against Apartheid, 1946-1994*, Bloomington 2004; Horne, *Mau Mau in Harlem?*
- 61 Gerald Horne, *Communist Front? The Civil Rights Congress, 1946-1956*, London 1988; Gerald Horne, *Black Liberation/Red Scare: Ben Davis and the Communist Party*, London 1994; Robin D. G. Kelley, *Hammer and Hoe. Alabama Communists during the Great Depression*, Chapel Hill 1990; Manning Marable, *Race, Reform and Rebellion: The Second Reconstruction and Beyond in Black America, 1945-2006*, Jackson 2006; Glenda E. Gilmore, *Defying Dixie: The Radical Roots of Civil Rights, 1919-1950*, New York 2008. Dieser linken Perspektive, nach der (afro-)amerikanische

meist als erste oder auch einzige mehrheitlich weiße Organisation, die im 20. Jahrhundert kompromisslos für Rassengleichheit eintrat und diese auch in ihren eigenen Reihen praktizierte. Die von Autoren und Autorinnen wie Gilmore gezogene Schlussfolgerung, die afroamerikanische Bürgerrechtsbewegung habe ihren Ursprung in einem linken Radikalismus, der in den 1920er Jahren entstanden sei und während der Popular-Front-Phase bis zum Kriegsende seine Blütezeit erlebt habe, trug zu einer der großen Paradigma-Debatten in der US-Geschichte bei.<sup>62</sup>

Eine analytische Erweiterung erfuhr dieses Feld erst in jüngster Zeit durch Untersuchungen, die mit einer transnationalen Perspektive und kulturgeschichtlichen Fragestellung eben diese Ambivalenzen, Wechselwirkungen und Differenzen zwischen der Selbstwahrnehmung der afroamerikanischen linken Akteure und den Interessen Moskaus in den Blick nehmen.<sup>63</sup> Diese Arbeiten zeigen, dass die Sowjetunion bereits ab den 1920er Jahren und später wieder nach dem Zweiten Weltkrieg einen wichtigen politisch-ideologischen Bezugspunkt für linke afroamerika-

---

Kommunisten und Kommunistinnen Teil einer progressiven sozialen Bewegung seien, die sich für soziale Gerechtigkeit und Rassengleichheit eingesetzt habe, steht eine traditionelle historiografische Schule gegenüber, die bis zum Untergang der Sowjetunion die politische und finanzielle Abhängigkeit der CPUSA vom Kreml aus stark antikommunistischer und oftmals stark vereinfachter Perspektive dargestellt hat (siehe hierzu Harvey Klehr, *The Heyday of American Communism: The Depression Decade*, New York 1984; Harvey Klehr/John Earl Haynes, *The American Communist Movement: Storming Heaven Itself*, Boston 1992; Harvey Klehr/John Earl Haynes/Fridrikh Igorevich Firsov, *The Secret World of American Communism*, New Haven 1995; John Earl Haynes, *Red Scare or Red Menace? American Communism and Anticommunism in the Cold War Era*, Chicago 1996; Guenter Lewy, *The Cause That Failed: Communism in American Political Life*, New York 1997; James G. Ryan, *Earl Browder: The Failure of American Communism*, Tuscaloosa 1997; Harvey Klehr/John Earl Haynes/Kyrill M. Anderson, *The Soviet World of American Communism*, New Haven 1998).

62 Jacquelyn Dowd Hall, »The Long Civil Rights Movement and the Political Uses of the Past«, in: *The Journal of American History*, 91/4 (2005), S. 1233-1263.

63 Kate A. Baldwin, *Beyond the Color Line and the Iron Curtain: Reading Encounters between Black and Red, 1922-1963*, Durham 2002; Woodford McCellan, »Black Hajj to ›Red Mecca‹. Africans and Afro-Americans at KUTV, 1925-1938«, in: Maxim Matusevich (Hg.), *Africa in Russia, Russia in Africa. Three Centuries of Encounters*, Trenton 2007, S. 61-83; Kate A. Baldwin, »The Russian Routes of Claude McKay's Internationalism«, in: Maxim Matusevich (Hg.), *Africa in Russia, Russia in Africa. Three Centuries of Encounters*, Trenton 2007, S. 85-109; Joy Gleason Carew, *Blacks, Reds, and Russians. Sojourners in Search of the Soviet Promise*, New Brunswick 2008; Hakim Adi, »Pan-Africanism and Communism: The Comintern, the ›Negro Question‹ and the First International Conference of Negro Workers, Hamburg 1930«, in: *African and Black Diaspora: An International Journal*, 1/2 (2008) S. 237-254; Maxim Matusevich, »Harlem Globe-Trotters: Black Sojourners in Stalin's Soviet Union«, in: Jeffrey O. G. Ogbar (Hg.), *The Harlem Renaissance Revisited. Politics, Arts, and Letters*, Baltimore 2010, S. 211-244; Minkah Makalani, *In the Cause of Freedom. Radical Black Internationalism from Harlem to London, 1917-1939*, Chapel Hill 2011; Hakim Adi, *Pan-Africanism and Communism. The Communist International, Africa and the Diaspora, 1919-1939*, Trenton 2013.

nische Aktivisten und Aktivistinnen darstellte, die glaubten, in der Sowjetunion einen Verbündeten in einem international ausgefochtenen Kampf gegen Rassismus gewonnen zu haben. Umgekehrt wird auch deutlich, dass die Sowjetunion schon früh einen propagandistischen Antirassismus vertrat, der sich zwar gezielt gegen den Jim-Crow-Rassismus im US-amerikanischen Süden richtete, jedoch primär zur Diskreditierung der USA beitragen sollte, ohne dabei notwendigerweise den Interessen afroamerikanischer Aktivisten und Aktivistinnen zu dienen.<sup>64</sup> Das belegen auch eine Reihe von biografisch angelegten Studien, in denen die politisch-ideologische Entwicklung von bisher kaum bekannten linken schwarzen Aktivistinnen wie Louise Thompson Patterson (Frau des prominenten afroamerikanischen Aktivisten William L. Patterson), Esther Cooper Jackson (Herausgeberin des afroamerikanischen Magazins *Freedomways*) oder Eslanda Robeson (Frau des afroamerikanischen Sängers und linken Aktivisten Paul Robeson) in den Blick nehmen und die Bedeutung des Kommunismus und eines internationalen Bezugsrahmens für deren Vorstellungen des schwarzen Freiheitskampfes herausgearbeitet wird.<sup>65</sup> Innerhalb dieses Forschungsfeldes verortet Erik McDuffie Angela Davis und ihren Aktivismus aufgrund ihrer politisch-ideologischen Positionen hinsichtlich der analytischen Trias aus *race*, *class* und *gender*, aber auch wegen ihrer persönlichen Verbindungen zu einigen der oben genannten Aktivistinnen in der Tradition dieses dezidiert linken schwarzen Internationalismus.<sup>66</sup>

Zur internationalen Perspektive auf den afroamerikanischen Freiheits- und Gleichheitskampf gehört auch das Interesse an transatlantischen Transferprozessen zwischen Afroamerikanern und Deutschen und ihrer Bedeutung für Rasse- und Rassismuskurse. Der regelrechte Boom, den diese Auseinandersetzung in den vergangenen fünfzehn Jahren erfahren hat, belegen beispielsweise Studien

---

64 Meredith L. Roman, *Opposing Jim Crow: African Americans and the Soviet Indictment of U.S. Racism, 1928-1937*, Lincoln 2012; Maxim Matusevich (Hg.), *Africa in Russia, Russia in Africa. Three Centuries of Encounters*, Trenton 2007.

65 Siehe Carole Boyce Davies, *Left of Karl Marx. The Political Life of Black Communist Claudia Jones*, Durham 2007; Dayo F. Gore/Jeanne Theoharis/Komozi Woodard (Hg.), *Want to Start a Revolution? Radical Women in the Black Freedom Struggle*, New York 2009; David Levering Lewis/Michael H. Nash/Daniel J. Leab (Hg.), *Red Activists and Black Freedom: James and Esther Jackson and the Long Civil Rights Revolution*, New York 2010; Dayo F. Gore, *Radicalism at the Crossroads. African American Women Activists in the Cold War*, New York 2011; Erik S. McDuffie, *Sojourning for Freedom. Black Women, American Communism, and the Making of Black Left Feminism*, Durham 2011; Barbara Ransby, *Eslanda: The Large and Unconventional Life of Mrs. Paul Robeson*, New Haven 2014. Diese Beiträge überschneiden sich auch mit Untersuchungen zur Wechselwirkung zwischen der Kommunistischen Partei und der Frauenbewegung in den USA (siehe Kate Weigand, *Red Feminism. American Communism and the Making of Women's Liberation*, Baltimore 2002; Beth Slutsky, *Gendering Radicalism. Women and Communism in Twentieth-Century*, Lincoln 2015).

66 McDuffie, *Sojourning for Freedom*, S. 203.

von Maria Höhn (2002), Petra Goedde (2003), Heide Fehrenbach (2005), Timothy L. Schroer (2007) oder Martin Klimke (2010). Sie haben grundlegend zur Erforschung der Verbindungen während des Kalten Krieges, aber auch zur Wiedereinführung des Rassebegriffs in den deutschen Diskurs und die Auseinandersetzung mit rassistischen Ressentiments in der Bundesrepublik beigetragen.<sup>67</sup> Maria Höhn und Martin Klimke (2010) haben diesen auf Westdeutschland ausgerichteten Analyserahmen erstmals auf die DDR ausgeweitet.<sup>68</sup> In ihrer Studie geben sie erstmalig einen Überblick über die Solidaritätsaktivitäten der DDR für das sogenannte *andere Amerika* – angefangen mit den Besuchen von W.E.B. Du Bois und Martin Luther King in den späten 1950er und frühen 1960er Jahren bis hin zur DDR-Solidaritätskampagne für Angela Davis zu Beginn der 1970er Jahre.<sup>69</sup> Klimke

67 Maria Höhn, *GIs and Fräuleins. The German-American Encounter in 1950s West Germany*, Chapel Hill 2002; Petra Goedde, *GIs and Germans. Culture, Gender, and Foreign Relations, 1945-1949*, New Haven 2003; Heide Fehrenbach, *Race after Hitler. Black Occupation Children in Postwar Germany and America*, Princeton 2005; Timothy L. Schroer, *Recasting Race After World War II. Germans and African Americans in American-Occupied Germany*, Boulder 2007; Manfred Berg, »American Wars and the Black Struggle for Freedom and Equality«, in: Georg Schild (Hg.), *The American Experience of War*, Paderborn 2009, S. 133-54; Klimke, *The ›Other‹ Alliance*; Maria Höhn/Martin Klimke, *A Breath of Freedom: The Civil Rights Struggle, African American GIs, and Germany*, New York 2010; Larry A. Greene/Anke Ortlepp (Hg.), *Germans and African Americans. Two Centuries of Exchange*, Jackson 2011; Katharina Gerund, *Transatlantic Cultural Exchange. African American Women's Art and Activism in West Germany*, Bielefeld 2013.

68 Höhn/Klimke, *A Breath of Freedom*, S. 123-141. Im Jahr 2016 ist die Studie auch in deutscher Übersetzung erschienen: Maria Höhn/Martin Klimke, *Ein Hauch von Freiheit. Afroamerikanische Soldaten, die US-Bürgerrechtsbewegung und Deutschland*, Bielefeld 2016.

69 In den vergangenen Jahren haben Begegnungen zwischen der DDR und Afroamerikanern sowie afroamerikanische Einflüsse in der DDR an Aufmerksamkeit gewonnen: Michael Rauhut, »The Voice of the Other America. African-American Music and Political Protest in the German Democratic Republic«, in: Timothy Scott Brown/Lorena Anton (Hg.), *Between the Avant-Garde and the Everyday. Subversive Politics in Europe from 1957 to the Present*, New York 2011, S. 92-108; Aribert Schroeder, »Ollie Harrington. His Portrait Drawn on the Basis of East German (GDR) Secret Service Files«, in: Greene/Ortlepp (Hg.), *Germans and African Americans*, S. 185-200; Astrid Haas, »A Raisin in the East. African American Civil Rights Drama in GDR Scholarship and Theater Practice«, in: Greene/Ortlepp (Hg.), *Germans and African Americans*, S. 166-184; Victor Grossman, »African Americans in the German Democratic Republic«, in: Greene/Ortlepp (Hg.), *Germans and African Americans*, S. 3-16; Michael Rauhut, *Ein Klang – Zwei Welten. Blues im geteilten Deutschland, 1945 bis 1990*, Bielefeld 2016. Maria Schubert, »We Shall Overcome«. *Die DDR und die amerikanische Bürgerrechtsbewegung*, Paderborn 2018. Auch wenn in der DDR-Forschung gerne über die DDR als eine der »dichtesten und gründlichsten erforschten Regionen der Weltgeschichte nach 1945« gesprochen wird (siehe Thomas Lindenberger, »Ist die DDR ausgeforscht? Phasen, Trends und ein optimistischer Ausblick«, in: *Aus Politik und Zeitgeschichte [APuZ]. Beilage zur Wochenzeitung das Parlament*, 3. Juni 2014 [24-26/2014], S. 27-32) steht die Erforschung der ambivalenten Beziehungen zwischen den USA und der DDR gerade hinsichtlich der kulturellen Bedeutung der USA weiterhin noch am Anfang. Einen historiografischen Überblick bietet Uta A. Balbier/Christiane Rösch, »Mehr als

und Höhn verorten die DDR-Solidaritätskampagne für Angela Davis damit im Kontext einer transatlantischen Bürgerrechts- und *Black Power*-Bewegung, die beide deutsche Staaten mit den USA verband.<sup>70</sup> Die Solidaritätskampagne für Davis stellte, wie Höhn und Klimke darlegen, den spektakulären Höhepunkt dieser DDR-Solidaritätspolitik für das *andere Amerika* dar.

Gleichzeitig kann die DDR-Solidaritätskampagne für Angela Davis auch, wie Katrina Hagen zeigt, als Teil der international ausgerichteten Anerkennungsbemühungen der DDR-Führung in Abgrenzung zur Bundesrepublik interpretiert werden, die vor dem Hintergrund einer zunehmenden diplomatischen Normalisierung in den deutsch-deutschen Beziehungen zu Beginn der 1970er Jahre stattfanden.<sup>71</sup> Über die internationale Solidaritätspolitik der DDR-Führung und ihre Beziehungen zum *Globalen Süden* sind in den letzten beiden Jahrzehnten eine Reihe unterschiedlicher Arbeiten entstanden, die von diplomatiegeschichtlichen Themen wie die DDR-Entwicklungshilfe in Asien und Afrika<sup>72</sup> bis hin zu kulturgeschichtli-

---

eine Fußnote: Das Verhältnis zwischen der DDR und den Vereinigten Staaten von Amerika«, in: dies. (Hg.), *Umworbener Klassenfeind. Das Verhältnis der DDR zu den USA*, S. 11-23. Folgende Beiträge existieren bereits: Jürgen Große, *Amerikapolitik und Amerikabild der DDR: 1974–1989*, Bonn 1999; Heinrich Bortfeldt, »In the Shadow of the Federal Republic. Cultural Relations Between the GDR and the United States – Cultural Relations Before Diplomatic Recognition«, in: Detlef Junker et al. (Hg.), *The United States and Germany in the Era of the Cold War, 1945–1990: A Handbook*, Bd. 1, New York 2004, S. 305-311; Rainer Schnoor, »The Good and the Bad America«, in: Detlef Junker et al. (Hg.), *The United States and Germany in the Era of the Cold War, 1945–1990: A Handbook*, Bd. 2, New York 2004, S. 618-626. Zu den kulturellen Einflüssen der USA besonders auf die Jugend der DDR siehe Poiger, *Jazz, Rock, and Rebels*. Im weiteren Sinne lassen sich zu der Erforschung der kulturellen Einflüsse der USA auch Arbeiten im Bereich der DDR-Jugend zählen, die ihren Fokus auf transnationale Transfer- und Adaptionsprozesse sowie die Formierung einer vom Westen beeinflussten Jugendkultur in der DDR richten (siehe Michael Rauhut, *Beat in der Grauzone. DDR-Rock 1964 bis 1972. Politik und Alltag*, Berlin 1993; Rebecca Menzel, *Jeans in der DDR. Vom tieferen Sinn einer Freizeithose*, Berlin 2004; Peter Wurschi, *Rennsteigbeat. Jugendliche Subkulturen im Thüringer Raum 1952-1989*, Köln 2007; Janssen, *Halbstarke in der DDR*; Leonard Schmieding, »Das ist unsere Party«. *HipHop in der DDR*, Stuttgart 2014.

70 Höhn/Klimke, *Ein Hauch von Freiheit*, S. 242-250.

71 Katrina M. Hagen, *Internationalism in Cold War Germany*, Ph.D. Diss., University of Washington 2008 (zugänglich via ProQuest), S. 325-374.

72 Ulrich van der Heyden/Ilona Schleicher/Hans-Georg Schleicher (Hg.), *Die DDR und Afrika*, Münster 1993; Werner Killian, *Die Hallstein-Doktrin. Der Diplomatische Krieg zwischen der BRD und der DDR 1955-1973*, Berlin 2001; Ingrid Muth, *Die DDR-Außenpolitik 1949-1972. Inhalte, Strukturen, Mechanismen*, Berlin 2000; Young-Sun Hong, »The Benefits of Health Must Spread Among All: International Solidarity, Health and Race in the East German Encounter with the Third World«, in: Katherine Pence/Paul Betts (Hg.), *Socialist Modern. East German Everyday Culture and Politics*, Ann Arbor 2008, S. 183-210; Klaus Storkmann, *Geheime Solidarität. Militärbeziehungen und Militärhilfe der DDR in die ›Dritte Welt‹*, Berlin 2012; Young-Sun Hong, *Cold War Germany, the Third World, and the Global Humanitarian Regime*, Cambridge 2015.

chen Fragestellungen zu ausländischen Vertragsarbeitern und Vertragsarbeiterinnen<sup>73</sup>, Studenten und Studentinnen<sup>74</sup> sowie »politische[n] Immigranten«<sup>75</sup> in der DDR reichen. Die in diesen Studien sichtbar gewordenen Widersprüche zwischen den offiziell propagierten Zielen der internationalen Solidarität und ihrer Praxis stehen auch im Fokus des 2015 erschienenen Bandes *Comrades of Color. East Germany in the Cold War World*.<sup>76</sup> Die dort versammelten Beiträge beschäftigen sich mit Begegnungen zwischen der DDR und nicht-weißen Akteuren und gehen der Frage nach, welche Rolle *race*, Rassismus und Antirassismus über den offiziellen Internationalismus hinaus in der DDR spielten. Wie Katrina M. Hagen in ihrem Aufsatz »Ambivalences and Desire in the East German ›Free Angela Davis‹ Campaign« zeigt, stellte Angela Davis eine zentrale Figur im Rassismuskurs der DDR zu Beginn der 1970er Jahre dar.<sup>77</sup> Dabei wurde Davis nicht nur, wie der Herausgeber

- 
- 73 Bernd Bröskamp (Hg.), *Schwarz-weiße Zeiten. AusländerInnen in Ostdeutschland vor und nach der Wende. Erfahrungen der Vertragsarbeiter aus Mosambik*, Bremen 1993; Annegret Schüle, »Proletarischer Internationalismus« oder »ökonomischer Vorteil für die DDR?«, in: *Archiv für Sozialgeschichte*, 42 (2002), S. 191-210; Dennis Kuck, »Für den sozialistischen Aufbau ihrer Heimat?« Ausländische Vertragsarbeiter in der DDR«, in: Jan C. Behrends/Thomas Lindenberger/Patrice G. Poutrus (Hg.), *Fremde und Fremd-Sein in der DDR. Zu Historischen Ursachen der Fremdenfeindlichkeit in Ostdeutschland*, Berlin 2003, S. 245-256; Karin Weiss/Mike Dennis (Hg.), *Erfolg in der Nische? Die Vietnamesen in der DDR und in Ostdeutschland*, Münster 2005; Mike Dennis/Norman LaPorte, *State and Minorities in Communist East Germany*, New York 2011; Christina Schwenkel, »Rethinking Asian Mobilities. Socialist Migration and Post-Socialist Repatriation of Vietnamese Contract Workers in East Germany«, in: *Critical Asian Studies*, 42/2 (2014), S. 235-258.
- 74 Frank Hirschinger, *Der Spionage verdächtig. Asylanten und ausländische Studenten in Sachsen-Anhalt 1945-1970*, Göttingen 2009.
- 75 Patrice G. Poutrus, »Teure Genossen«. Die »Politischen Emigranten« als »Fremde« im Alltag der DDR-Gesellschaft«, in: Christian Th. Müller/Patrice G. Poutrus (Hg.), *Ankunft, Alltag, Ausreise. Migration und interkulturelle Begegnungen in der DDR-Gesellschaft*, Berlin 2003, S. 221-266; Patrice G. Poutrus, »An den Grenzen des proletarischen Internationalismus. Algerische Flüchtlinge in der DDR«, in: *Zeitschrift für Geschichtswissenschaft*, 2/2007, S. 162-178.
- 76 Quinn Slobodian (Hg.), *Comrades of Color. East Germany in the Cold War World*, New York 2015. Der Band kann als Teil einer Reihe von Studien gesehen werden, die sich mit der Zirkulation von Symbolen und Menschen, Transfer- und Austauschprozessen sowie Wechselwirkungen sowohl innerhalb des Ostblocks als auch zwischen Staaten der sogenannten sozialistischen Zweiten Welt und dem postkolonialen Globalen Süden beschäftigen (siehe Alexander Cook (Hg.), *Mao's Little Red Book. A Global History*, New York 2014; Robeson Taj Frazier, *The East is Black. Cold War China in the Black Radical Imagination*, Durham 2015; Robert Gildea/James Mark/Niek Pas, »European Radicals and the ›Third World‹. Imagined Solidarities and Radical Networks, 1958-1973«, in: *Cultural and Social History*, 8/4 (2011), S. 449-472.
- 77 Katrina M. Hagen, »Ambivalences and Desire in the East German ›Free Angela Davis‹ Campaign«, in: Slobodian (Hg.), *Comrades of Color*, S. 157-187. In ihrer Dissertation »Internationalism in Cold War Germany« (2008) beschreibt Katrina Hagen »Rasse« und Rassismus bereits als bestimmende Themen der außenpolitischen Selbstdarstellung des SED-Regimes.

in der Einleitung des Bandes feststellt, zur »de facto Botschafterin für die Sache des Antirassismus«<sup>78</sup> in der DDR, sondern forderte die SED-Führung, die Angela Davis als linientreue Kommunistin darzustellen versuchte, mit ihren politisch-ideologischen Positionen zur Intersektionalität von »Rasse«, Klasse und Geschlecht durchaus heraus.<sup>79</sup>

Zur Erforschung der ideologischen Denkmuster und politischen Vorstellungswelten, die das kommunistisch-afroamerikanische Verbundenheitsgefühl zwischen der DDR und Angela Davis bestärkten, wird in der vorliegenden Untersuchung auf schriftliche und bildliche Quellenüberlieferungen zurückgegriffen. Diese wurden aus deutschen und US-amerikanischen Archiven zusammengetragen und erstmals in einem Quellenbestand zusammengeführt. Der Bestand umfasst Dokumente aus den Parteiarchiven der SED und der CPUSA, publizistische Quellen (Zeitungen, Zeitschriften, Sachbücher, Newsletter, Broschüren, Pamphlete), Plakate, illustrierte Flugblätter, Rundfunkbeiträge sowie bildliche Überlieferungen wie Fotografien und Filmdokumente. Diese verschiedenen Quellentypen vernetzen unterschiedliche gesellschaftliche und politische Bereiche und ermöglichen so ein vertieftes Verständnis der politischen und kulturellen »Breitenwirkung« staatlich organisierter Solidaritätskampagnen in der Alltagswelt der sozialistischen Diktatur. Ergänzt wird diese Perspektive durch Protokolle und Korrespondenzen des Zentralkomitees der SED, des Friedensrats der DDR, der DDR-Jugendorganisation *Freie Deutsche Jugend* (FDJ) und anderer Massenorganisationen und Verbände anlässlich der Planung und Durchführung der Solidaritätskampagne und der Besuche von Davis. Hinzu kommen Reportagen und Berichte über Davis und ihren Justizprozess im *Neuen Deutschland* (Tageszeitung und Zentralorgan der DDR), der *Jungen Welt* (Tageszeitung, herausgegeben vom Zentralrat der FDJ) und der *Für Dich* (Frauenzeitschrift) sowie Fernseh- und Radiobeiträge, Publikationen und Beiträge, die bei verschiedenen Wettbewerben (Mal-, Lied- und Kunstwettbewerbe) im Zusammenhang mit der DDR-Solidaritätskampagne für Angela Davis eingegangen sind.

Für die Formierung der Solidaritätskampagne spielten die Leitmedien der DDR in ihrer vom Zentralkomitee (ZK) der SED zugeordneten Funktion als »ideologische Waffe der Partei für Frieden und Sozialismus« eine zentrale Rolle.<sup>80</sup> Entsprechend Lenins medienpolitischen Dogmas, wonach die Zeitungen »kollektiver Propagandist, Agitator und Organisator« seien, fand in der DDR zu jeder Zeit eine »de-

78 Quinn Slobodian, »Introduction«, in: Slobodian (Hg.), *Comrades of Color*, S. 1-22, hier: S. 6.

79 Hagen, »Ambivalences and Desire«, S. 177.

80 ZK der SED, »Die ideologische Waffe der Partei für Frieden und Sozialismus – Presse, Rundfunk und Fernsehen beim umfassenden Aufbau des Sozialismus in der Deutschen Demokratischen Republik«, in: ZK der SED (Hg.), *Dokumente der SED, Beschlüsse und Erklärungen des ZK sowie seines Politbüros*, Bd. X, Berlin (Ost) 1967, S. 275-287, S. 257.

taillierte inhaltliche Lenkung« der Medieninhalte statt.<sup>81</sup> Die Art, wie Informationen in der Presse dargestellt wurden, diente der Herrschaftsausübung des Parteiregimes. Diese kommunikative Praxis regelte, wie wichtige Handlungsakteure sprachlich kenntlich gemacht wurden, wie Ideologie und »Realität« in ein Verhältnis zueinander gesetzt wurden und welches Vokabular zur Bezeichnung sozialer Sachverhalte gebraucht wurde.<sup>82</sup> Die Berichterstattung erlaubte es den Lesern, auf »Interessen und Probleme der Herrschenden zu schließen« und sich so »an die geltenden Normen anzupassen«.<sup>83</sup> Folglich kann davon ausgegangen werden, dass die zunehmende Berichterstattung über Angela Davis, die kurze Zeit nach ihrer Verhaftung am 13. Oktober 1970 in der DDR-Presse einsetzte, allen voran im *Neuen Deutschland* und der *Jungen Welt*, eine wichtige Quellensammlung für die Beantwortung der Frage ist, welche Vorstellungswelten und kollektiven Sinngebungen für die Solidarisierung mit Angela Davis bereitstanden oder bereitgestellt wurden. Berichte des Ministeriums für Staatssicherheit, die anlässlich Davis' Besuch 1972 verfasst wurden, geben – wenn auch nur bedingt – Aufschluss über die Bedenken der Parteiführung hinsichtlich ihrer Person und der vermeintlich mit ihr verbundenen ideologisch-politischen Risiken.

Leider hat Angela Davis ihren persönlichen Nachlass erst nach Abschluss dieser Doktorarbeit der Öffentlichkeit zugänglich gemacht, weshalb dieser für die Untersuchung nicht mehr genutzt werden konnte.<sup>84</sup> Daher stellt die kurz nach ihrem Freispruch erschienene Autobiografie (1974) eine zentrale Quelle dar, um ihre Verbundenheit mit der DDR im Kontext ihrer politisch-ideologischen Selbstidentifikation und Identitätsbildung nachzuvollziehen.<sup>85</sup> Damit folgt diese Arbeit der An-

---

81 Gunter Holzweißig, »Massenmedien in der DDR«, in: Jürgen Wilke (Hg.), *Mediengeschichte der Bundesrepublik Deutschland*, Bonn 1999, S. 573–602, hier: S. 574; Anke Fiedler/Michael Meyen (Hg.), *Fiktionen für das Volk: DDR-Zeitungen als PR-Instrument, Fallstudien zu den Zentralorganen Neues Deutschland, Junge Welt, Neue Zeit und Der Morgen*, Münster 2011. Zur Einflussnahme des Ministeriums für Staatssicherheit in den Zeitungsredaktionen siehe Anke Fiedler, »DDR-Zeitungen und Staatssicherheit: Zwischen staatlicher Öffentlichkeitsarbeit und operativer Absicherung«, in: Deutschland Archiv Online, 10.05.2013, URL: [www.bpb.de/159750](http://www.bpb.de/159750) (zuletzt abgerufen: 01.02.2020). Anke Fiedler/Michael Meyen, »Jenseits von Gleichförmigkeit und Propaganda. Warum es sich lohnt, DDR-Zeitungen zu untersuchen«, in: Fiedler/Meyen (Hg.), *Fiktionen für das Volk*, S. 7–24.

82 Jessen, Ralph, »Diktatorische Herrschaft als kommunikative Praxis. Überlegungen zum Zusammenhang von »Bürokratie« und Sprachnormierung in der DDR-Geschichte«, in: *Presse in der DDR: Beiträge und Materialien*, 01.06.2011, URL: [https://pressegeschichte.docupedia.de/wiki/Diktatorische\\_Herrschaft\\_als\\_kommunikative\\_Praxis\\_Version\\_1.html](https://pressegeschichte.docupedia.de/wiki/Diktatorische_Herrschaft_als_kommunikative_Praxis_Version_1.html) (zuletzt abgerufen: 01.02.2020).

83 Ebenda.

84 Seit November 2019 zugänglich unter: *Angela Y. Davis Papers, 1937–2017*. MC 940. Schlesinger Library, Radcliffe Institute, Harvard University.

85 Angela Davis, *Angela Davis. An Autobiography*, New York 2<sup>a</sup> 1988. Davis verstand das Verfassen ihrer Autobiografie als Teil ihres politischen Aktivismus. Im Vorwort zu der knapp 15 Jahre

sichtsweise der neueren Sozial- und Kulturgeschichte, autobiografische Texte als relevante Quellen anzusehen, statt Davis' Autobiografie wegen ihrer Subjektivität den historischen Erkenntniswert abzusprechen. So sind autobiografische Texte in der Lage, wie Volker Depkat schreibt, »das überaus komplexe und dynamische Verhältnis von Identität und Erinnerung« zu offenbaren.<sup>86</sup> Bezieht man die Textualität von Autobiografien mit ein und billigt dem Text einen Eigenwert zu, kann die Autobiografie – anders als bisher – nicht nur als »vermittelndes Material« verstanden werden, das lediglich »Informationen über eine außertextuelle Realität enthält«, sondern auch als »Quelle für die historische Rekonstruktion von Erinnerungs- und Identitätsbildungsprozessen« herangezogen werden. Auch in Davis' Autobiografie offenbart der hier entworfene Strukturzusammenhang die »Wirkung von Sozialisationsinstanzen und die Geltung von kollektiv geteilten Wertideen, Normen und Vorstellungswelten ebenso wie den Wandel dieser Prägung« und trägt so dazu bei, ihre Beziehung zur DDR und die damit verbundenen Zusammengehörigkeitsvorstellungen zu erklären.<sup>87</sup> Interviews, die Davis afroamerikanischen Medien wie der *Ebony*, *JET* oder *Muhammed Speaks* gegeben hat, und Aufsätze, zum Beispiel aus dem 1971 von Davis herausgegebenen Band *If they Come in the Morning*<sup>88</sup>, werden deshalb genutzt, um diese 1974 verfasste Selbstdarstellung zu ergänzen und in Perspektive zu setzen.

Die in der *Tamiment Library* der New York University verwahrte Sammlung der CPUSA, die sich zum Zeitpunkt der Archivrecherche teilweise noch in der Inventarisierungsphase befand, und in unterschiedlichen Archiven<sup>89</sup> aufbewahrten Mate-

---

nach ihrem Erscheinen herausgegebenen Neuauflage schreibt Davis, dass sie das Verfassen ihrer Autobiografie als Möglichkeit betrachte, um die »politische Bedeutung ihrer Erfahrungen« zu bewerten. Der politische Charakter ihrer Erfahrungen entspringe, so Davis weiter, »ihrer Arbeit als Aktivistin in der schwarzen Bewegung und ihrer Mitgliedschaft in der Kommunistischen Partei« (siehe ebenda, S. VIII). Der Literaturwissenschaftlerin Margo V. Perkins zufolge solle das Verfassen der eigenen Autobiografie dazu beitragen, die eigenen Umstände mit denen anderer Aktivisten und Aktivistinnen über historische Perioden hinweg zu verbinden (siehe Margo V. Perkins, *Autobiography as Activism. Three Black Women of the Sixties*, Jackson 2011, S. 1ff.). Im Sinne einer Form des politischen Aktivismus verfassten auch andere Aktivisten und Aktivistinnen der *Black Power*-Ära ihre Autobiografien, zum Beispiel Elaine Brown mit *A Taste of Power. A Black Woman's Story* (New York 1994), Assata Shakur mit *Assata: An Autobiography* (New York 1987) oder Bobby Seale mit *A Lonely Rage. The Autobiography of Bobby Seale* (New York 1978).

86 Depkat, »Autobiographien und die soziale Konstruktion von Wirklichkeit«, S. 445.

87 Ebenda, S. 452, S. 466–468.

88 Angela Davis (Hg.), *If They Come in the Morning. Voices of Resistance*, London 1971.

89 Im Rahmen dieser Arbeit wurden folgende Sammlungen gesichtet: *Bettina Aptheker Papers* (MS 157), Special Collections and Archives, University Library, University of California, Santa Cruz; *Angela Davis Academic Freedom Case & Trial and Defense Movement Records* (MSS 093), Southern California Library for Social Studies and Research, Los Angeles; *Angela Davis Legal Defense Collection* (Sc MG 410), Schomburg Center for Research in Black Culture, The New York

rialien des *National United Committee to Free Angela Davis* (NUCFAD) wurden im Verlauf der Archivrecherche erstmals umfassend gesichtet. Neben Korrespondenzen, Flugblättern, Broschüren, Reden und internen Positionspapieren fand sich hier auch ein Großteil der Solidaritätsbriefe- und Postkarten wieder, die aus der DDR an Davis ins Gefängnis geschickt wurden. Alleine im Bestand der *Special Collection* der Stanford University befinden sich rund 200 Kisten, die zum Großteil mit – meist noch ungeöffneter – Solidaritätspost aus der DDR gefüllt sind.<sup>90</sup> Eine umfassende quantitative und qualitative Untersuchung der gelagerten Solidaritätspost muss daher zukünftigen Arbeiten überlassen werden.

Die Zeitungen und Periodika *Black Panther Intercommunal News*, *Daily World*, *Ebony*, *Freedomways*, *JET*, *Newsweek*, *New York Times*, *People's World*, *Washington Post* sowie die *Frankfurter Allgemeine Zeitung* (FAZ), die *Süddeutsche Zeitung*, *Der Spiegel* und *Die ZEIT* geben einen Überblick über die verschiedenen Reaktionen und Rezeptionen im öffentlichen Diskurs der USA sowie der Bundesrepublik.

Beobachtungsprotokolle der CIA über Entwicklungen in den Ostblockstaaten und Westeuropa (zugänglich über das »CIA Records Search Tool« in den *National Archives* in College Park, Maryland)<sup>91</sup> sowie veröffentlichte Anhörungen vor dem *Committee on Internal Security* des US-Repräsentantenhauses, vormals *House Committee on Un-American Activities* (HUAC), geben außerdem Einblick in die

---

Public Library, NYC, *Communist Party of the United States of America Records* (TAM.132), Tamiment Library/Robert F. Wagner Labor Archives, NYU, sowie die *Angela Y. Davis Collection*, Stuart A. Rose Manuscript, Archives, and Rare Book Library, Emory University, Atlanta.

90 *National United Committee to Free Angela Davis records, circa 1970-1972* (MO262), Departement of Special Collections, Stanford University. Weitere Solidaritätspost aus der DDR befindet sich in den Beständen *Communist Party of the United States of America Records* und *National Alliance Against Racial and Political Repression Records/Angela Davis Defense Committee*. Der Inhalt wurde allerdings bisher noch nicht bearbeitet, sodass nur eine stichprobenartige Auswahl zur Anschauung und Auswertung bereitgestellt werden konnte. Darunter befanden sich neben einer Reihe von mit Unterschriften versehenen Postern und Bannern beispielsweise auch Gegenstände wie die Arthur-Becker-Medaille in Gold, von der FDJ im Oktober 1971 in absentia an Angela Davis verliehen, oder eine noch original verpackte FDJ-Bluse.

91 Seit Januar 2017 sind die bereits archivierten CREST-Unterlagen als Online-Sammlung unter CREST: 25-Year Program Archive zugänglich, URL: <https://www.cia.gov/library/readingroom/collection/crest-25-year-program-archive> zuletzt abgerufen: 01.02.2020). Um Einsicht in Aufzeichnungen und Akten des amerikanischen Justizministeriums und des FBI über Angela Davis zu erhalten, wurde im Rahmen dieser Arbeit ein Freedom of Information Act (FOIA)-Antrag eingereicht. Die Überprüfung der rund 800 Seiten umfassenden Akte »FBI case file 100-HQ-461537« wurde auf Grundlage des FOIA im März 2016 abgeschlossen und es wurden rund 600 Seiten zur Einsicht in den National Archives (College Park, Maryland) freigegeben. Diese Unterlagen konnten aufgrund des langwierigen Verfahrens im Rahmen dieser Arbeit nicht mehr als Quellen berücksichtigt werden, dies muss späteren Arbeiten überlassen werden.

US-Regierungsperspektive auf Davis' politische Aktivitäten. Der Lesbarkeit wegen wurden die meisten hier verwendeten englischen Quellen übersetzt.

Trotz dieser Vielzahl an Quellen aus verschiedenen Bereichen sieht sich auch diese Arbeit mit der für die kulturgeschichtliche Erforschung kommunistischer Parteidiktaturen eigenen Frage konfrontiert, in welchem Verhältnis die Herrschaftspraktiken des Parteiregimes und der Eigensinn und die Freiwilligkeit der Bevölkerung stehen und wie sie zu interpretieren sind. Denn wie die Propagandaforschung gezeigt hat, stimmte die Botschaft »von oben« mit der Bedeutungszuweisung »von unten« zumeist kaum überein.<sup>92</sup> Mit den hier verwendeten Quellen lassen sich Antworten auf mögliche gesellschaftliche Wirkungsmechanismen oder subjektive Wahrnehmungen daher nur hypothetisch formulieren. Auch können an dieser Stelle keine Aussagen darüber getroffen werden, wie groß beispielsweise die Verankerung und das gesellschaftliche Integrationspotenzial der DDR-Solidaritätskampagne für Angela Davis auf individueller Ebene wirklich war. Um die mögliche Bandbreite an individuellen Perspektiven auf die Solidaritätskampagne und die Person Angela Davis in der DDR zu erfassen, müsste der untersuchte Quellenbestand durch subjektive Erinnerungszeugnisse, zum Beispiel durch die Erhebung und Analyse narrativer Interviews, erweitert werden. Eine solche Untersuchung subjektiver Perspektiven muss jedoch ebenfalls zukünftigen Arbeiten überlassen werden. Dasselbe gilt für Angela Davis' persönliche Perspektive auf die DDR-Solidaritätskampagne und die Wahrnehmung ihrer Beziehung zur DDR. Mehrere Interviewanfragen blieben unbeantwortet und werden als Hinweis interpretiert, dass Angela Davis ihrer wiederholt öffentlich kundgegebenen Verbundenheit zur DDR und ihrer Wahrnehmung der DDR-Solidaritätskampagne als Teil einer internationalen Bewegung aktuell nichts hinzuzufügen hat.

Die Untersuchung gliedert sich in insgesamt vier Kapitel. Zunächst liegt der Fokus bei der Untersuchung der internationalen Solidaritätspolitik der DDR und dem sozialistischen Antirassismus auf der Beantwortung der Frage nach den Vorstellungswelten und Wirklichkeitskonstruktionen, die als Grundlage für die Solidarisierung mit Angela Davis bereitstanden.

Das zweite Kapitel widmet sich der personellen Dimension der Vorstellungswelten und Wirklichkeitskonstruktionen. Frühe Begegnungen zwischen schwarzen linken Aktivisten und Aktivistinnen ab den 1920er Jahren sowie die Entstehung kommunistisch-afroamerikanischer Verbundenheitsvorstellungen werden nachgezeichnet und in ihrer Bedeutung für den Selbstlegitimierungsdiskurs der jungen DDR sichtbar gemacht. Dies bildet den Kontext für die Initiierung und Ausgestaltung der DDR-Solidaritätskampagne für Angela Davis.

---

92 Rainer Gries, »Propagandageschichte als Kulturgeschichte. Methodische Erwartungen und Erfahrungen«, in: *Deutschland Archiv*, 33/4 (2000), S. 558-570.

Das dritte Kapitel legt den Fokus auf die Frage nach Angela Davis und ihrer politisch-ideologischen Prägung und inwiefern diese als Grundlage für die Verbundenheit mit der DDR diene. Dementsprechend wird die Entwicklung ihres Identitätsentwurfs chronologisch und biografisch nachgezeichnet. Die augenscheinlichen Widersprüche zwischen Angela Davis' politisch-ideologischer Symbolik und ihrer Verbundenheit zur DDR werden hier besonders beachtet.

Im vierten Kapitel wird die DDR-Solidaritätskampagne für Angela Davis dargestellt. Dabei werden Kontinuitäten und Neuerungen sowohl der Verbundenheitsvorstellungen der DDR als auch von Angela Davis aufgezeigt. Der Fokus liegt hier darauf, wie in der DDR zu Beginn der 1970er Jahre internationale Solidarität mit dem *anderen Amerika* verstanden und Angela Davis in die DDR-Vorstellungswelt eingebettet wurde. Die Perspektive von Angela Davis wird anhand ihrer Besuche in der DDR 1972 und 1973 herausgearbeitet. Gleichzeitig werden transnationale Wechselwirkungen und Transferprozesse im Kontext der DDR-Solidaritätskampagne in den Blick genommen. Eine Zusammenfassung der Ergebnisse, eine Beantwortung der erkenntnisleitenden Fragestellungen sowie eine abschließende Bewertung finden sich im letzten Kapitel.
